# Supplementary material for: Review of psychological effects of dog bites in children
Source: PubMed Central journal article supplement (PMC11163822; doi:10.1136/bmjpo-2020-000922), 2024-06-06
Supplement: bmjpo-2020-000922.draft_revisions.pdf [file bmjpo-2020-000922.draft_revisions.pdf]

# BMJ Paediatrics Open

BMJ Paediatrics Open is committed to open peer review. As part of this commitment we make the peer review history of every article we publish publicly available.

When an article is published we post the peer reviewers' comments and the authors' responses online. We also post the versions of the paper that were used during peer review. These are the versions that the peer review comments apply to.

The versions of the paper that follow are the versions that were submitted during the peer review process. They are not the versions of record or the final published versions. They should not be cited or distributed as the published version of this manuscript.

BMJ Paediatrics Open is an open access journal and the full, final, typeset and author-corrected version of record of the manuscript is available on our site with no access controls, subscription charges or pay-per-view fees (<http://bmjpaedsopen.bmj.com>).

If you have any questions on BMJ Paediatrics Open's open peer review process please email [info.bmjpo@bmj.com](mailto:info.bmjpo@bmj.com)



# BMJ Paediatrics Open

## Psychological effects of dog bites in children

|                               |                                                                                                                                                                                                                                                                                                                                                                                                                   |
|-------------------------------|-------------------------------------------------------------------------------------------------------------------------------------------------------------------------------------------------------------------------------------------------------------------------------------------------------------------------------------------------------------------------------------------------------------------|
| Journal:                      | <i>BMJ Paediatrics Open</i>                                                                                                                                                                                                                                                                                                                                                                                       |
| Manuscript ID                 | bmjpo-2020-000922                                                                                                                                                                                                                                                                                                                                                                                                 |
| Article Type:                 | Review                                                                                                                                                                                                                                                                                                                                                                                                            |
| Date Submitted by the Author: | 02-Apr-2024                                                                                                                                                                                                                                                                                                                                                                                                       |
| Complete List of Authors:     | Westgarth, Carri; University of Liverpool Faculty of Health and Life Sciences, Department of Livestock and One Health; University of Liverpool<br>Provazza, Serena; Alder Hey Children's NHS Foundation Trust, Department of Clinical Health Psychology<br>Nicholas, Jade; Independent Researcher<br>Gray, Victoria; Alder Hey Children's Hospital NHS Foundation Trust, Department of Clinical health Psychology |
| Keywords:                     | Child Health, Adolescent Health, Psychology                                                                                                                                                                                                                                                                                                                                                                       |
|                               |                                                                                                                                                                                                                                                                                                                                                                                                                   |

SCHOLARONE™  
Manuscripts

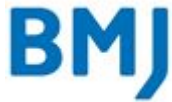

I, the Submitting Author has the right to grant and does grant on behalf of all authors of the Work (as defined in the below author licence), an exclusive licence and/or a non-exclusive licence for contributions from authors who are: i) UK Crown employees; ii) where BMJ has agreed a CC-BY licence shall apply, and/or iii) in accordance with the terms applicable for US Federal Government officers or employees acting as part of their official duties; on a worldwide, perpetual, irrevocable, royalty-free basis to BMJ Publishing Group Ltd ("BMJ") its licensees and where the relevant Journal is co-owned by BMJ to the co-owners of the Journal, to publish the Work in this journal and any other BMJ products and to exploit all rights, as set out in our [licence](#).

The Submitting Author accepts and understands that any supply made under these terms is made by BMJ to the Submitting Author unless you are acting as an employee on behalf of your employer or a postgraduate student of an affiliated institution which is paying any applicable article publishing charge ("APC") for Open Access articles. Where the Submitting Author wishes to make the Work available on an Open Access basis (and intends to pay the relevant APC), the terms of reuse of such Open Access shall be governed by a Creative Commons licence – details of these licences and which [Creative Commons](#) licence will apply to this Work are set out in our licence referred to above.

Other than as permitted in any relevant BMJ Author's Self Archiving Policies, I confirm this Work has not been accepted for publication elsewhere, is not being considered for publication elsewhere and does not duplicate material already published. I confirm all authors consent to publication of this Work and authorise the granting of this licence.

## Psychological effects of dog bites in children

Westgarth, C<sup>1</sup>., Provazza, S<sup>2</sup>., Nicholas, J.<sup>3</sup>, Gray, V<sup>2</sup>.

1 Department of Livestock and One Health, Institute of Infection, Veterinary and Ecological

Sciences, University of Liverpool, Leahurst Campus, Neston, Cheshire, CH66 1QU, UK

2 Department of Clinical Health Psychology, Alder Hey Children's NHS Foundation Trust, Eaton Road, Liverpool, Merseyside, L12 2AP, UK.

3 Independent Researcher, Hampshire, UK.

### ABSTRACT

Dog bites are a concerning health problem in children and one of the leading causes of non-fatal injuries in this population. Dog attacks not only cause physical injuries but can also lead to long-term psychological problems. A systematic review was performed to investigate the scope of literature on psychological effects of dog bites on a paediatric population. A literature search was performed on Web of Knowledge database between 1982-June 2023, returning 249 results. 14 primary studies reporting the psychological consequences of dog bites in children or adolescents were classed as eligible and 9 further studies added from prior knowledge and bibliographical searches. 23 studies involving 1894 participants met the criteria and were included in this review. Of these 23 studies, 8 were case studies or small case series reports (up to n=4), 14 larger descriptive studies, and 1 analytical cross-sectional study. There was a mixture of retrospective and prospective data-gathering. The most common psychological consequences of dog bites in children were post-traumatic stress disorder, dog phobia, nightmares and symptoms of anxiety and avoidance behaviours. Studies on dog bites in a paediatric population with a specific focus on the psychological consequences associated with dog bites and their management are sparse. Future research and practice should more greatly consider the psychological impact in child victims of dog bites and their family members, as well as their management to avoid development of mental health

1  
2  
3 issues and improve their quality of life. Future research also needs to ascertain the efficacy of using  
4  
5 Virtual Reality in treating children with dog phobia.  
6  
7  
8  
9

## 10 **KEY MESSAGES**

- 12 • Psychological consequences of dog bites to children are common but under-researched and  
13 often overlooked.
- 14 • Typical consequences of dog bites are post-traumatic stress disorder, dog phobia,  
15 nightmares and symptoms of anxiety and avoidance behaviours.
- 16 • Treatment of dog phobias can be challenging to deliver.
- 17 • Virtual reality offers a potential ethical and safe, controlled environment for cognitive  
18 behavioural therapy regarding dogs.

## 29 **INTRODUCTION**

30  
31  
32  
33 Dog ownership is argued to provide some health benefits<sup>1-3</sup>, however, dogs, as well as other  
34 animals, may cause severe injuries to humans. Although there are no global estimates of dog bites  
35 incidence, the World Health Organization reports dog bites account for tens of millions of injuries  
36 annually<sup>4</sup>. As a result, dog bites represent a major public health concern, affecting predominately  
37 the paediatric population<sup>5</sup>. In the UK, incidence of hospital admissions for dog bites in children (14  
38 or under) is stable at approximately 14.4 per 100,000 population per year<sup>5</sup>.  
39  
40  
41  
42  
43  
44  
45  
46  
47  
48  
49

50 It is well established that most of the child dog bite victims are bitten inside the home, and most  
51 dogs involved are known to the victim<sup>6,7</sup>. The COVID-19 global pandemic and the subsequent  
52 implementation of lockdowns with a 'stay at home' order forced children to spend more time than  
53 usual at home with a significant increase in dog bites<sup>8,9</sup>.  
54  
55  
56  
57  
58  
59  
60

1  
2  
3 Some evidence supports that children are more vulnerable to dog attacks compared to adults  
4  
5 because of their smaller physical size, their underestimation of risk and their tendency to behave  
6  
7 more impulsively <sup>10</sup>, as well as leaning-in behaviour with animals in young children <sup>11</sup>. Rates of  
8  
9 admission peak in the 5-9 age group <sup>8</sup>. Furthermore, children are often injured in the neck and head  
10  
11 regions and many have facial wounds <sup>12-14</sup>. The younger the child the more frequent the bites are to  
12  
13 the face <sup>14 15</sup> and young children have more extensive/severe injuries <sup>13 16</sup>.

14  
15  
16  
17  
18  
19 In addition to physical impact, dog bites often carry health care costs <sup>8</sup>. They also produce  
20  
21 psychological costs to the victims and other parties involved <sup>17-19</sup>, however, compared to physical,  
22  
23 psychological consequences of dog bites and their management is still scarcely investigated and  
24  
25 poorly reported <sup>20 21</sup>. Timely recognition of psychological symptoms caused by dog attacks in  
26  
27 children and subsequent psychological support to the child victims and their families would be of  
28  
29 critical importance to prevent development of future mental health issues, which would in turn  
30  
31 influence the quality of life of the children and their caretakers. The aim of this systematic review  
32  
33 was to explore current evidence on the psychological impact of dog bites in children and  
34  
35 adolescents.  
36  
37  
38  
39  
40  
41

## 42 **METHODS**

### 43 Protocol and inclusion criteria

44  
45 This systematic review was conducted according to the standards established by the Preferred  
46  
47 Reporting Items for Systematic Reviews <sup>22</sup>.  
48  
49  
50  
51

52  
53 A search of Web of Knowledge database was performed to identify original research articles  
54  
55 focusing on psychological consequences of dog bite injuries in the paediatric population from 1982-  
56  
57 June 2023. The search term used on all fields was:  
58  
59  
60

1  
2  
3 ("child\* OR pediatric") AND (dog\* OR cani\*) AND (bit\* OR attack\*) AND  
4  
5 (psychological OR PTSD OR phobia OR trauma\* OR anxiety)  
6  
7  
8  
9

10 At least the abstract needed to be available in English for assessment for relevant inclusion, and  
11 screening was performed by CW and SP. Articles were excluded if: they were not an original  
12 primary source of evidence in a scientific journal (ie book chapter or review papers were excluded);  
13 the study population did not include children (ie under 18 years of age, although it could also  
14 include adults); studies focused on bites in general (e.g., human bites, cat bites etc) rather than dog;  
15 the information reported was not specific to psychological effects of dog bites but rather on dog  
16 bites in general (e.g., wound management, dog bite incidence etc). Articles were excluded based on  
17 reading the full paper if the title or abstract did not already clearly exclude it; if the study purpose  
18 and population was deemed relevant, often the full paper needed to be read in order to find if  
19 psychological effects had been reported. Further relevant studies were also identified from  
20 bibliographic searches and prior knowledge. See Figure 1 for study search and inclusion flowchart.  
21 Due to the low number of studies that met the inclusion criteria and low-level of evidence study  
22 designs used (case studies and descriptive case series), all studies have been reported here rather  
23 than exclusion based on quality. Evaluation and summary of the study design and psychological  
24 findings was performed by CW and JN.  
25  
26  
27  
28  
29  
30  
31  
32  
33  
34  
35  
36  
37  
38  
39  
40  
41  
42  
43  
44  
45  
46

## 47 **RESULTS**

48  
49 Out of 249 papers screened for eligibility, 14 studies met the criteria and were included in this  
50 review, along with 9 other studies identified through prior knowledge and bibliographies, totalling  
51 23 studies involving 1894 participants (Figure 1). Of these 23 studies, eight were single case studies  
52 or small case series (up to 4 children per report )<sup>23-30</sup> (Table 1). Thirteen were descriptive studies of  
53 larger patient groups<sup>7 15 18 19 31-39</sup>, one was a case-control study but the psychological findings were  
54 only descriptive<sup>40</sup>, and one was an analytical cross-sectional study<sup>41</sup> (Table 2). A mixture of  
55  
56  
57  
58  
59  
60



1  
2  
3 retrospective (ie incidental review of past case records, survey regarding fear of dogs) and  
4  
5 prospective data collection (deliberate interview of dog bite cases as they attended hospital, follow-  
6  
7 up interview of a cohort of bitten children) methods were reported depending on the study, and  
8  
9 sometimes both.  
10

### 11 12 13 14 Summary of the findings

15  
16 One study specific to dog bite patients estimated that 70% of children had demonstrated concerning  
17  
18 behaviours since the incident<sup>37</sup>. Post-traumatic Stress Disorder was commonly encountered, being  
19  
20 mentioned in eight studies: 2 of 4 children (a family in which one child was bitten)<sup>23</sup>, diagnosed in  
21  
22 a case study<sup>28</sup>, diagnosed in descriptive studies of dog bite patients at a prevalence of 12/22<sup>31</sup>,  
23  
24 12/22<sup>19</sup>, 19/358<sup>18</sup>; 98% within 5 days of a traumatic facial incident some of which were dog bites  
25  
26  
27  
28  
29  
30  
31  
32  
33  
34  
35  
36  
37  
38  
39  
40  
41  
42  
43  
44  
45  
46  
47  
48  
49  
50  
51  
52  
53  
54  
55  
56  
57  
58  
59  
60  
61  
62  
63  
64  
65  
66  
67  
68  
69  
70  
71  
72  
73  
74  
75  
76  
77  
78  
79  
80  
81  
82  
83  
84  
85  
86  
87  
88  
89  
90  
91  
92  
93  
94  
95  
96  
97  
98  
99  
100  
101  
102  
103  
104  
105  
106  
107  
108  
109  
110  
111  
112  
113  
114  
115  
116  
117  
118  
119  
120  
121  
122  
123  
124  
125  
126  
127  
128  
129  
130  
131  
132  
133  
134  
135  
136  
137  
138  
139  
140  
141  
142  
143  
144  
145  
146  
147  
148  
149  
150  
151  
152  
153  
154  
155  
156  
157  
158  
159  
160  
161  
162  
163  
164  
165  
166  
167  
168  
169  
170  
171  
172  
173  
174  
175  
176  
177  
178  
179  
180  
181  
182  
183  
184  
185  
186  
187  
188  
189  
190  
191  
192  
193  
194  
195  
196  
197  
198  
199  
200  
201  
202  
203  
204  
205  
206  
207  
208  
209  
210  
211  
212  
213  
214  
215  
216  
217  
218  
219  
220  
221  
222  
223  
224  
225  
226  
227  
228  
229  
230  
231  
232  
233  
234  
235  
236  
237  
238  
239  
240  
241  
242  
243  
244  
245  
246  
247  
248  
249  
250  
251  
252  
253  
254  
255  
256  
257  
258  
259  
260  
261  
262  
263  
264  
265  
266  
267  
268  
269  
270  
271  
272  
273  
274  
275  
276  
277  
278  
279  
280  
281  
282  
283  
284  
285  
286  
287  
288  
289  
290  
291  
292  
293  
294  
295  
296  
297  
298  
299  
300  
301  
302  
303  
304  
305  
306  
307  
308  
309  
310  
311  
312  
313  
314  
315  
316  
317  
318  
319  
320  
321  
322  
323  
324  
325  
326  
327  
328  
329  
330  
331  
332  
333  
334  
335  
336  
337  
338  
339  
340  
341  
342  
343  
344  
345  
346  
347  
348  
349  
350  
351  
352  
353  
354  
355  
356  
357  
358  
359  
360  
361  
362  
363  
364  
365  
366  
367  
368  
369  
370  
371  
372  
373  
374  
375  
376  
377  
378  
379  
380  
381  
382  
383  
384  
385  
386  
387  
388  
389  
390  
391  
392  
393  
394  
395  
396  
397  
398  
399  
400  
401  
402  
403  
404  
405  
406  
407  
408  
409  
410  
411  
412  
413  
414  
415  
416  
417  
418  
419  
420  
421  
422  
423  
424  
425  
426  
427  
428  
429  
430  
431  
432  
433  
434  
435  
436  
437  
438  
439  
440  
441  
442  
443  
444  
445  
446  
447  
448  
449  
450  
451  
452  
453  
454  
455  
456  
457  
458  
459  
460  
461  
462  
463  
464  
465  
466  
467  
468  
469  
470  
471  
472  
473  
474  
475  
476  
477  
478  
479  
480  
481  
482  
483  
484  
485  
486  
487  
488  
489  
490  
491  
492  
493  
494  
495  
496  
497  
498  
499  
500  
501  
502  
503  
504  
505  
506  
507  
508  
509  
510  
511  
512  
513  
514  
515  
516  
517  
518  
519  
520  
521  
522  
523  
524  
525  
526  
527  
528  
529  
530  
531  
532  
533  
534  
535  
536  
537  
538  
539  
540  
541  
542  
543  
544  
545  
546  
547  
548  
549  
550  
551  
552  
553  
554  
555  
556  
557  
558  
559  
560  
561  
562  
563  
564  
565  
566  
567  
568  
569  
570  
571  
572  
573  
574  
575  
576  
577  
578  
579  
580  
581  
582  
583  
584  
585  
586  
587  
588  
589  
590  
591  
592  
593  
594  
595  
596  
597  
598  
599  
600  
601  
602  
603  
604  
605  
606  
607  
608  
609  
610  
611  
612  
613  
614  
615  
616  
617  
618  
619  
620  
621  
622  
623  
624  
625  
626  
627  
628  
629  
630  
631  
632  
633  
634  
635  
636  
637  
638  
639  
640  
641  
642  
643  
644  
645  
646  
647  
648  
649  
650  
651  
652  
653  
654  
655  
656  
657  
658  
659  
660  
661  
662  
663  
664  
665  
666  
667  
668  
669  
670  
671  
672  
673  
674  
675  
676  
677  
678  
679  
680  
681  
682  
683  
684  
685  
686  
687  
688  
689  
690  
691  
692  
693  
694  
695  
696  
697  
698  
699  
700  
701  
702  
703  
704  
705  
706  
707  
708  
709  
710  
711  
712  
713  
714  
715  
716  
717  
718  
719  
720  
721  
722  
723  
724  
725  
726  
727  
728  
729  
730  
731  
732  
733  
734  
735  
736  
737  
738  
739  
740  
741  
742  
743  
744  
745  
746  
747  
748  
749  
750  
751  
752  
753  
754  
755  
756  
757  
758  
759  
760  
761  
762  
763  
764  
765  
766  
767  
768  
769  
770  
771  
772  
773  
774  
775  
776  
777  
778  
779  
780  
781  
782  
783  
784  
785  
786  
787  
788  
789  
790  
791  
792  
793  
794  
795  
796  
797  
798  
799  
800  
801  
802  
803  
804  
805  
806  
807  
808  
809  
810  
811  
812  
813  
814  
815  
816  
817  
818  
819  
820  
821  
822  
823  
824  
825  
826  
827  
828  
829  
830  
831  
832  
833  
834  
835  
836  
837  
838  
839  
840  
841  
842  
843  
844  
845  
846  
847  
848  
849  
850  
851  
852  
853  
854  
855  
856  
857  
858  
859  
860  
861  
862  
863  
864  
865  
866  
867  
868  
869  
870  
871  
872  
873  
874  
875  
876  
877  
878  
879  
880  
881  
882  
883  
884  
885  
886  
887  
888  
889  
890  
891  
892  
893  
894  
895  
896  
897  
898  
899  
900  
901  
902  
903  
904  
905  
906  
907  
908  
909  
910  
911  
912  
913  
914  
915  
916  
917  
918  
919  
920  
921  
922  
923  
924  
925  
926  
927  
928  
929  
930  
931  
932  
933  
934  
935  
936  
937  
938  
939  
940  
941  
942  
943  
944  
945  
946  
947  
948  
949  
950  
951  
952  
953  
954  
955  
956  
957  
958  
959  
960  
961  
962  
963  
964  
965  
966  
967  
968  
969  
970  
971  
972  
973  
974  
975  
976  
977  
978  
979  
980  
981  
982  
983  
984  
985  
986  
987  
988  
989  
990  
991  
992  
993  
994  
995  
996  
997  
998  
999  
1000

Other than formally reporting PTSD/ASD, specific symptoms most commonly described in the articles were fearfulness/avoidance of dogs<sup>24 25 27 30 33 36-39</sup> and sleep disturbance/nightmares<sup>23-25 31</sup>

1  
2  
3 36-38 40. Other symptoms included bed wetting <sup>23 25</sup>, selective mutism <sup>28</sup>, traumatic memories/re-  
4 living <sup>19 28 31</sup>, talking a lot about the incident <sup>37</sup>, increased arousal <sup>19 31</sup>, anger/aggression <sup>24 31</sup>,  
5  
6 withdrawn/depressed/numbing <sup>19 28 31 35</sup>, fearful <sup>37</sup>, panic attacks <sup>27</sup>, anxiety <sup>35 36</sup>, hypervigilance <sup>31</sup>,  
7  
8 difficulty playing/avoidance of playing outdoors <sup>24 30</sup>, anxiety about hospitals <sup>37</sup>, fear of dying or re-  
9  
10 injury <sup>35</sup>, and phobia of own image <sup>36</sup>.  
11  
12  
13  
14  
15  
16

17 Notably, parents reported changes in their behaviours as well, proving that dog bites represent a  
18  
19 burden not only for the victims but also for their family <sup>34 37</sup> Parents described feeling shaken <sup>25</sup>,  
20  
21 guilty, fearful for child's safety and worried about scars <sup>37</sup>.  
22  
23  
24  
25

26 Despite the reporting of psychological symptoms after dog bites in children, it was rare for  
27  
28 psychological treatment to be recorded; although it featured in case studies <sup>23 25 27-30</sup>, when  
29  
30 evaluating descriptive studies it was only reported in 2/100 <sup>15</sup>, 2/277 <sup>7</sup>, 2/38 <sup>40</sup> patients. Indeed, two  
31  
32 studies specifically noted no children received any psychological services (0/22 <sup>19</sup>; 0/34 <sup>37</sup>) but 50%  
33  
34 of parents felt it would be helpful <sup>37</sup>. Hon et al (2007) acknowledged that one challenge to  
35  
36 collecting these data is that in an emergency department service where dog bites present is it might  
37  
38 be difficult to gather information about psychological and emotional trauma <sup>21</sup>. Clearly there is an  
39  
40 unidentified gap in both the literature and patient need for psychological assessment. In addition it  
41  
42 has been suggested that interventions should also include educational programmes on the risk and  
43  
44 severity of dog attacks offered to parents and children, given dog bites can have significant  
45  
46 psychological consequences that can negatively impact on children quality of life <sup>29</sup>.  
47  
48  
49  
50  
51  
52

## 53 **DISCUSSION**

54  
55  
56 The main purpose of this review was to explore the current literature on paediatric dog bites, with a  
57  
58 specific focus on the psychological impacts of dog bites in children, as the psychological  
59  
60 consequences of dog bites as well as their treatment are often overlooked <sup>20 21</sup>. Evidence suggested

1  
2  
3 that children bitten by dogs are at high risk of developing psychological disturbances, ranging from  
4  
5 fear of dogs to clinical PTSD, however, few studies mentioned psychological management or  
6  
7 treatment offered after dog attacks. It appears that assessing children in an emergency department  
8  
9 (ED) to evaluate psychological sequelae following dog bites, and further offering them  
10  
11 psychological support, can be difficult and/or lacks consideration. This may result in psychological  
12  
13 symptoms significantly impacting children and potentially worsening. A form of follow-up  
14  
15 assessment is likely to be required to assess whether initial symptoms of psychological distress have  
16  
17 settled, but whom this responsibility falls to once a patient is discharged from the ED, is unclear.  
18  
19 Further, not only did dog injuries have an impact on the victims, but they also affected their carers.  
20  
21 Psychological symptoms showed by young victims of dog bites seemed to be long lasting with  
22  
23 some studies reporting over 12 months. Age and gender differences were inconclusive between  
24  
25 studies but across studies more severe bites commonly resulted in more serious psychological  
26  
27 impact.  
28  
29  
30  
31  
32  
33  
34

35 It is clear that many children who have been bitten by dogs or are otherwise fearful of dogs may  
36  
37 benefit from psychological treatment. Although different approaches have been found to be  
38  
39 effective in treating phobia for dogs in children, CBT (cognitive behavioural therapy) regarding  
40  
41 some form of graded exposure appears to be the most widely utilised<sup>42 43</sup>. A difficulty with this is  
42  
43 the ethical and practical safety implications regarding controlled exposure to real animals who can  
44  
45 be difficult to access, unpredictable and to some extent uncontrollable in their behaviours, and with  
46  
47 their own welfare considerations<sup>44</sup>. For example, one intervention states “*Parents were not*  
48  
49 *provided with explicit instructions on how to find dogs but were encouraged to consider various*  
50  
51 *options: dogs owned by extended family members, neighbors, and friends; dogs at pet stores,*  
52  
53 *breeders, and animal shelters; dogs at the park or other recreation areas”<sup>43</sup>. Another play-based*  
54  
55 *intervention used dogs with handlers within the intensive session, with no description about how*  
56  
57 *these had been assessed for suitability, and “during the session, the child was encouraged to engage*  
58  
59  
60

1  
2  
3 *in a range of different tasks with each dog including approaching and patting the dog, offering the*  
4 *dog treats and walking the dog on the lead”* <sup>42</sup>. Great care must be taken in order to be able to  
5  
6 gradually control the intensity of exposure and also safeguard both child and animal welfare during  
7  
8 such treatment so that neither becomes overwhelmed and both have a positive experience. This  
9  
10 includes providing very clear guidance to those delivering it, including parents. A potential more  
11  
12 ethical solution to these challenges during the intensive and early stages of therapy would be to use  
13  
14 virtual reality <sup>44</sup>. This would allow a gradual and controlled increase in exposure to particular dog  
15  
16 behaviours required for that case. For example, Farrel (2021) have suggested the use of Virtual  
17  
18 Reality therapy in treating dog phobia can be possible using just one treatment session <sup>45</sup>. In eight  
19  
20 children with specific phobia of dogs, after one month follow-up, 75% of the children were  
21  
22 considered recovered. The authors concluded that VR can be effectively be used as an alternative to  
23  
24 the classic in-vivo exposure-based therapy and might overcome some of its challenges as the most  
25  
26 difficult CBT technique to deliver. More research is needed to confirm the efficacy of VR as an  
27  
28 effective treatment of dog fear in a paediatric population.  
29  
30  
31  
32  
33  
34  
35  
36  
37

38 This review has the merit of investigating and summarising existing evidence on psychological  
39  
40 effects of paediatric dog bites and their management, as to the best of our knowledge, such  
41  
42 investigation has not been conducted before. However, it presents with some limitations. First of  
43  
44 all, even though the literature search was performed on a highly relevant database, some studies  
45  
46 may be missing from this review. Additionally, of the few studies identified, many had a very  
47  
48 limited sample size, which may limited the statistical power and generalizability of the findings.  
49  
50 Therefore, the conclusions drawn here should be taken with caution. Notwithstanding the above  
51  
52 limitations, this review provides an insight into the psychological consequences of paediatric dog  
53  
54 bites.  
55  
56  
57  
58  
59  
60

1  
2  
3 To conclude, dog bites in children represent a traumatic event, which can cause devastating  
4  
5 psychological consequences in the victims and in their families. A thorough investigation of the  
6  
7 psychological impact of dog bites on children and their parents followed by a prompt  
8  
9 multidisciplinary management of both physical and psychological symptoms would lead to better  
10  
11 outcomes, preventing the occurrence of more severe mental health problems such as phobia and  
12  
13 PTSD and improve the quality of life of the victims and their families. Furthermore, educational  
14  
15 programmes on the risk and severity of dog attacks should be offered to parents and children, to  
16  
17 prevent dog bites. Cognitive behavioural therapy can be used to treat fear of dogs in children, with  
18  
19 VR representing an alternative to the classic in vivo exposition therapy. Future research should  
20  
21 focus more on the psychological impact of dog injuries and on the treatment of child victims of dog  
22  
23 bites and their family members, to avoid development of mental health issues and improve their  
24  
25 quality of life.  
26  
27  
28  
29  
30  
31  
32

### 33 **FUNDING**

34  
35 This work was supported by the Faculty of Health and Life Sciences, University of Liverpool.  
36

### 37 **COMPETING INTERESTS**

38  
39 CW is a member of the Merseyside Dog Safety Partnership, which has a website containing useful  
40  
41 resources for dog bite prevention. [www.merseydogsafe.co.uk](http://www.merseydogsafe.co.uk). There are no other competing  
42  
43 interests to declare.  
44  
45

### 46 **RESEARCH ETHICS APPROVAL**

47  
48 Not applicable - this study does not involve human participants.  
49

### 50 **CONTRIBUTORS**

51  
52 CW conceptualised the paper. CW and SP performed the searches and paper selection. CW and JN  
53  
54 reviewed the papers and assimilated the data. CW and SP wrote the first draft. All authors  
55  
56 commented on and revised the paper. CW submitted the paper.  
57  
58  
59

### 60 **DATA AVAILABILITY**

1  
2  
3 No other datasets were generated.  
4

## 5 **PATIENT CONSENT FOR PUBLICATION**

6  
7 Not applicable.  
8  
9

## 10 **PROVENANCE AND PEER REVIEW**

11  
12 Commissioned; externally peer reviewed.  
13  
14  
15  
16

## 17 **REFERENCES**

- 18  
19 1. Herzog H. The Impact of Pets on Human Health and Psychological Well-Being: Facto, Fiction,  
20 or Hypothesis? *Current Directions in Psychological Science* 2011;20:236-39.  
21  
22 2. O'Haire M. Companion animals and human health: Benefits, challenges, and the road ahead.  
23 *Journal of Veterinary Behaviour* 2010;5:226-34.  
24  
25 3. Rodriguez KE, Herzog H, Gee NR. Variability in Human-Animal Interaction Research. *Front*  
26 *Vet Sci* 2021;7:9. doi: 10.3389/fvets.2020.619600  
27  
28 4. WHO. Animal Bites: World Health Organisation; 2018 [cited 2024 9th January]. Available from:  
29 <https://www.who.int/news-room/fact-sheets/detail/animal-bites>.  
30  
31 5. Tulloch JSP, Owczarczak-Garstecka SC, Fleming KM, et al. English hospital episode data  
32 analysis (1998–2018) reveal that the rise in dog bite hospital admissions is driven by adult  
33 cases. *Scientific Reports* 2021;11(1):1767. doi: 10.1038/s41598-021-81527-7  
34  
35 6. Cornelissen JMR, Hopster H. Dog bites in The Netherlands: A study of victims, injuries,  
36 circumstances and aggressors to support evaluation of breed specific legislation. *Veterinary*  
37 *Journal* 2010;186(3):292-98. doi: 10.1016/j.tvjl.2009.10.001  
38  
39 7. Chiam SC, Solanki NS, Lodge M, et al. Retrospective review of dog bite injuries in children  
40 presenting to a South Australian tertiary children's hospital emergency department. *J*  
41 *Paediatr Child Health* 2014;50(10):791-4. doi: 10.1111/jpc.12642 [published Online First:  
42 2014/07/22]  
43  
44 8. Tulloch JSP, Minford S, Pimblett V, et al. Paediatric emergency department dog bite attendance  
45 during the COVID-19 pandemic: an audit at a tertiary children's hospital. *BMJ paediatrics*  
46 *open* 2021;5(1):e001040-e40. doi: 10.1136/bmjpo-2021-001040  
47  
48 9. Parente G, Gargano T, Di Mitri M, et al. Consequences of COVID-19 Lockdown on Children  
49 and Their Pets: Dangerous Increase of Dog Bites among the Paediatric Population. *Children*  
50 *(Basel)* 2021;8(8) doi: 10.3390/children8080620 [published Online First: 2021/08/28]  
51  
52 10. Shen J, Rouse J, Godbole M, et al. Systematic Review: Interventions to Educate Children About  
53 Dog Safety and Prevent Pediatric Dog-Bite Injuries: A Meta-Analytic Review. *J Pediatr*  
54 *Psychol* 2017;42(7):779-91. doi: 10.1093/jpepsy/jsv164  
55  
56 11. Meints K, Syrnyk C, De Keuster T. Why do children get bitten in the face? *Injury Prevention*  
57 2010;16(Suppl 1):A172-A73. doi: 10.1136/ip.2010.029215.617  
58  
59 12. Kasbekar AV, Garfit H, Duncan C, et al. Dog bites to the head and neck in children; an  
60 increasing problem in the UK. *Clinical Otolaryngology* 2013;38(3):259-62. doi:  
[10.1111/coa.12094](https://doi.org/10.1111/coa.12094)  
13. Khan K, Horswell BB, Samanta D. Dog-Bite Injuries to the Craniofacial Region: An  
Epidemiologic and Pattern-of-Injury Review at a Level 1 Trauma Center. *Journal of Oral*  
*and Maxillofacial Surgery* 2020;78(3):401-13. doi:  
<https://doi.org/10.1016/j.joms.2019.11.002>

14. Sribnick EA, Sarda S, Sawvel MS, et al. Dog bite injuries in children: Clinical implications for head involvement. *Trauma* 2016;18(3):210-15. doi: 10.1177/1460408616631772
15. Kahn A, Bauche P, Lamoureux J, et al. Child victims of dog bites treated in emergency departments: a prospective survey. *European Journal of Pediatrics* 2003;162(4):254-58. doi: 10.1007/s00431-002-1130-6
16. Brogan TV, Bratton SL, Dowd MD, et al. SEVERE DOG BITES IN CHILDREN. *Pediatrics* 1995;96(5):947-50.
17. Westgarth C, Watkins F. Chapter 23: Impact of dog aggression on victims. In: Mills DS, Westgarth C, eds. *Dog Bites: A Multidisciplinary Perspective*. 1st Edition ed. Sheffield: 5M Publishing 2017:309-20.
18. Ji L, Xiaowei Z, Chuanlin W, et al. Investigation of posttraumatic stress disorder in children after animal-induced injury in China. *Pediatrics* 2010;126(2):e320-4. doi: 10.1542/peds.2009-3530 [published Online First: 2010/07/14]
19. Peters V, Sottiaux M, Appelboom J, et al. Posttraumatic stress disorder after dog bites in children. *The Journal of Pediatrics* 2004;144(1):121-22. doi: <http://dx.doi.org/10.1016/j.jpeds.2003.10.024>
20. Jakeman M, Oxley JA, Owczarczak-Garstecka SC, et al. Pet dog bites in children: management and prevention. *BMJ Paediatrics Open* 2020;4(1):e000726. doi: 10.1136/bmjpo-2020-000726
21. Hon KLE, Fu CCA, Chor CM, et al. Issues associated with dog bite injuries in children and adolescents assessed at the emergency department. *Pediatric Emergency Care* 2007;23(7):445-49.
22. Page MJ, McKenzie JE, Bossuyt PM, et al. The PRISMA 2020 statement: an updated guideline for reporting systematic reviews. *BMJ* 2021;372:n71. doi: 10.1136/bmj.n71
23. Albano AM, Miller PP, Zarate R, et al. Behavioral assessment and treatment of PTSD in prepubertal children: Attention to developmental factors and innovative strategies in the case study of a family. *Cognitive and Behavioral Practice* 1997;4(2):245-62. doi: [https://doi.org/10.1016/S1077-7229\(97\)80003-X](https://doi.org/10.1016/S1077-7229(97)80003-X)
24. Drell MJ, Gaensbauer TJ, Siegel CH, et al. Clinical round table: A case of trauma to a 21-month-old girl. *Infant Mental Health Journal* 1995;16(4):318-33. doi: [https://doi.org/10.1002/1097-0355\(199524\)16:4<318::AID-IMHJ2280160407>3.0.CO;2-L](https://doi.org/10.1002/1097-0355(199524)16:4<318::AID-IMHJ2280160407>3.0.CO;2-L)
25. Gislason IL, Call JD. Dog Bite in Infancy: Trauma and Personality Development. *Journal of the American Academy of Child Psychiatry* 1982;21(2):203-07. doi: [https://doi.org/10.1016/S0002-7138\(09\)60921-3](https://doi.org/10.1016/S0002-7138(09)60921-3)
26. Macias D, Kwon DI, Walker PC, et al. Microvascular replantation of a composite facial avulsion in a 24-month-old child after dog bite. *Microsurgery* 2018;38(2):218-21. doi: <https://doi.org/10.1002/micr.30275>
27. Saha S. Life-Threatening Panfacial Wild Dog Bites in a Child. *Wilderness & Environmental Medicine* 2021;32(4):511-16. doi: <https://doi.org/10.1016/j.wem.2021.07.001>
28. Anyfantakis D, Botzakis E, Mplevrakis E, et al. Selective mutism due to a dog bite trauma in a 4-year-old girl: A case report. *Journal of Medical Case Reports* 2009;3
29. de Carvalho MF, Hardtke LA, de Souza MF, et al. Comminuted mandibular fracture in child victim of dog bite. *Dent Traumatol* 2012;28(4):324-8. doi: 10.1111/j.1600-9657.2011.01079.x [published Online First: 2011/11/22]
30. Glasscock SE, MacLean Jr WE. Use of Contact Desensitization and Shaping in the Treatment of Dog Phobia and Generalized Fear of the Outdoors. *Journal of Clinical Child Psychology* 1990;19(2):169-71. doi: 10.1207/s15374424jccp1902\_9
31. De Keuster T, Lamoureux J, Kahn A. Epidemiology of dog bites: A Belgian experience of canine behaviour and public health concerns. *Veterinary Journal* 2006;172(3):482-87.

- 1  
2  
3 32. Hersant B, Cassier S, Constantinescu G, et al. Facial dog bite injuries in children: Retrospective  
4 study of 77 cases. *Annales De Chirurgie Plastique Esthetique* 2012;57(3):230-39. doi:  
5 10.1016/j.anplas.2011.11.003  
6  
7 33. Pédrone G, Ricard C, Bouilly M, et al. Assessment of 16-month Sequelae Due to Dog Bites  
8 Originally Studied in a French Multicenter Survey from 2009 to 2011. *Wounds*  
9 2018;30(5):84-89. [published Online First: 2018/03/10]  
10  
11 34. Rossman BR, Bingham RD, Emde RN. Symptomatology and adaptive functioning for children  
12 exposed to normative stressors, dog attack, and parental violence. *J Am Acad Child Adolesc*  
13 *Psychiatry* 1997;36(8):1089-97. doi: 10.1097/00004583-199708000-00016 [published  
14 Online First: 1997/08/01]  
15  
16 35. Rusch MD, Grunert BK, Sanger JR, et al. Psychological adjustment in children after traumatic  
17 disfiguring injuries: A 12-month follow-up. *Plastic and Reconstructive Surgery*  
18 2000;106(7):1451-58.  
19  
20 36. Touré G, Angoulangouli G, Méningaud J-P. Epidemiology and classification of dog bite injuries  
21 to the face: A prospective study of 108 patients. *Journal of Plastic, Reconstructive &*  
22 *Aesthetic Surgery* 2015;68(5):654-58. doi: <https://doi.org/10.1016/j.bjps.2015.01.001>  
23  
24 37. Boat BW, Dixon CA, Pearl E, et al. Pediatric dog bite victims: a need for a continuum of care.  
25 *Clin Pediatr (Phila)* 2012;51(5):473-7. doi: 10.1177/0009922811435504 [published Online  
26 First: 2012/02/02]  
27  
28 38. Schalamon J, Ainoedhofer H, Singer G, et al. Analysis of dog bites in children who are younger  
29 than 17 years. *Pediatrics* 2006;117(3):E374-E79. doi: 10.1542/peds.2005-1451  
30  
31 39. Shen J, Li S, Xiang H, et al. Antecedents and consequences of pediatric dog-bite injuries and  
32 their developmental trends: 101 cases in rural China. *Accident Analysis and Prevention*  
33 2014;63:22-29.  
34  
35 40. Parent B, Bykowski MR, Marji FP, et al. Pediatric Craniofacial Fractures From Canine Bites. *J*  
36 *Craniofac Surg* 2021;32(4):1627-32. doi: 10.1097/scs.00000000000007546 [published  
37 Online First: 2021/03/21]  
38  
39 41. Doogan S, Thomas GV. Origins of fear of dogs in adults and children: The role of conditioning  
40 processes and prior familiarity with dogs. *Behaviour Research and Therapy* 1992;30(4):387-  
41 94. doi: [https://doi.org/10.1016/0005-7967\(92\)90050-Q](https://doi.org/10.1016/0005-7967(92)90050-Q)  
42  
43 42. Farrell LJ, Kershaw H, Ollendick T. Play-Modified One-Session Treatment for Young Children  
44 with a Specific Phobia of Dogs: A Multiple Baseline Case Series. *Child Psychiatry Hum*  
45 *Dev* 2018;49(2):317-29. doi: 10.1007/s10578-017-0752-x [published Online First:  
46 2017/08/03]  
47  
48 43. Radtke SR, Muskett A, Coffman MF, et al. Bibliotherapy for Specific Phobias of Dogs in  
49 Young Children: A Pilot Study. *Journal of Child and Family Studies* 2023;32(2):373-83.  
50 doi: 10.1007/s10826-022-02304-2  
51  
52 44. Oxley JA, Santa K, Meyer G, et al. A Systematic Scoping Review of Human-Dog Interactions  
53 in Virtual and Augmented Reality: The Use of Virtual Dog Models and Immersive  
54 Equipment. *Frontiers in Virtual Reality* 2022;3 doi: 10.3389/frvir.2022.782023  
55  
56 45. Farrell LJ, Miyamoto T, Donovan CL, et al. Virtual Reality One-Session Treatment of Child-  
57 Specific Phobia of Dogs: A Controlled, Multiple Baseline Case Series. *Behavior Therapy*  
58 2021;52(2):478-91. doi: <https://doi.org/10.1016/j.beth.2020.06.003>  
59  
60



1  
2  
3  
4 **FIGURES**  
5  
6  
7

8  
9 Figure 1. Flow chart of study search and screening process for studies of psychological  
10  
11 consequences of dog bites to children  
12  
13  
14  
15  
16  
17  
18  
19  
20  
21  
22  
23  
24  
25  
26  
27  
28  
29  
30  
31  
32  
33  
34  
35  
36  
37  
38  
39  
40  
41  
42  
43  
44  
45  
46  
47  
48  
49  
50  
51  
52  
53  
54  
55  
56  
57  
58  
59  
60

1  
2  
3 **TABLES**  
4  
5  
6

7 Table 1: Case studies/small case-series identified in searches of psychological consequences of dog  
8 bites to children.  
9

| Paper title                                                                                                                                                      | Year | Author/s                                                                   | Study design                                                                                                                                                                                                                                                                                                                                 | Participants                                             | Psychological findings                                                                                                                                                                                                                                                                                                                                                                                                                                                           |
|------------------------------------------------------------------------------------------------------------------------------------------------------------------|------|----------------------------------------------------------------------------|----------------------------------------------------------------------------------------------------------------------------------------------------------------------------------------------------------------------------------------------------------------------------------------------------------------------------------------------|----------------------------------------------------------|----------------------------------------------------------------------------------------------------------------------------------------------------------------------------------------------------------------------------------------------------------------------------------------------------------------------------------------------------------------------------------------------------------------------------------------------------------------------------------|
| Behavioural Assessment and Treatment of PTSD in Prepubertal Children: Attention to Developmental Factors and Innovative Strategies in the Case Study of a Family | 1997 | AM Albano<br>PP Miller<br>G CotéDH<br>Barlow                               | Mixed methods case study observing one family after a traumatic incident dog bite. Prospective. Diagnostic interviews. Observational methods including rating sleep cycles of children, recording enuresis episodes and recording incidents of new behaviour since the incident. Family behavioural tests with units of distress calculated. | N=4<br>M age 7<br>F age 6 (bitten)<br>F age 4<br>F age 2 | Oldest 2 children diagnosed with PTSD. Nocturnal changes in 2 children (bed wetting) represents a “significant change in functioning”. All 4 children experienced moderate to severe sleep disturbances. “It was noted that as the age of the child increased, the more cognitively mediated symptoms and expression of fear became apparent.” Adult symptoms went into remission without treatment.                                                                             |
| Selective mutism due to a dog bite trauma in a 4-year-old girl: a case report                                                                                    | 2009 | D Anyfantakis<br>E Botzakis<br>E Mplevrakis<br>EK Symvoulakis<br>I Arbiros | Case study. Retrospective.                                                                                                                                                                                                                                                                                                                   | N=1<br>F age 5                                           | On admission was confused and lethargic – findings showed hypovolemic shock. 2 <sup>nd</sup> day of hospitalisation – child was withdrawn and depressed – used non verbal communication. 2 months after discharge was non-verbal and had recurrent traumatic memories. Case met all criteria for selective mutism and acute PTSD. Treatment consisted of “supportive psychotherapy for the child and consecutive sessions of counselling for her parents”. Improvement after 6M. |
| Clinical Round Table: A Case of Trauma to a 21-Month-Old Girl                                                                                                    | 1995 | MJ Drell<br>TJ Gaensbauer<br>CH Siegel<br>M Sugar                          | Case study. Retrospective.                                                                                                                                                                                                                                                                                                                   | N=1<br>F age 1                                           | Detailed account of symptoms and therapy of child and mother. Child displayed fearfulness of dogs, nightmares, anger, difficulty playing.                                                                                                                                                                                                                                                                                                                                        |

|                                                                                                                |      |                                                                                  |                                                                                                                                                        |                                      |                                                                                                                                                                                                                                                                                                                                                                                                                                                                                                                                                                                                                                           |
|----------------------------------------------------------------------------------------------------------------|------|----------------------------------------------------------------------------------|--------------------------------------------------------------------------------------------------------------------------------------------------------|--------------------------------------|-------------------------------------------------------------------------------------------------------------------------------------------------------------------------------------------------------------------------------------------------------------------------------------------------------------------------------------------------------------------------------------------------------------------------------------------------------------------------------------------------------------------------------------------------------------------------------------------------------------------------------------------|
| Comminuted mandibular fracture in child victim of dog bite                                                     | 2012 | M Furtado de Carvalho<br>LAP Hardtke<br>MF Cota de Souza<br>V de Oliveira Araujo | Case study.<br>Retrospective.                                                                                                                          | N=1<br>M age 3                       | The patient was seen every day by oral and maxillofacial surgeons, dieticians, pediatricians, plastic surgeons, ophthalmologists, otorhinolaryngologists, physiotherapists, and psychologists.”<br>Emphasis on the importance of a prompt multi-disciplinary approach.                                                                                                                                                                                                                                                                                                                                                                    |
| CASE REPORT:<br>Dog Bites in Infancy, Trauma and Personality Development                                       | 1982 | IL Gislason<br>JD Call                                                           | Case series of children bitten by dogs.<br>Retrospective.<br>Interviewed accompanied by parents on 4 separate occasions.<br>Semi structured interview. | N=3<br>M age 1<br>F age 2<br>F age 3 | “(first child) personality changed from being charming and outgoing prior to the bite to being cautious and inhibited after the bite.”<br>First child referring to dog as “the bad dog” and mentioning wanting to shoot the dog when he grows up.<br>Clinginess increased in second child after incident.<br>Second child had nightmares for 3 years.<br>Third child developed bed wetting.<br>Third child showed increased clinginess, thumb sucking, nightmares.<br>Third child described as “withdrawn” after incident.<br>All children more afraid of strange dogs after their incidents.<br>All mothers were psychologically shaken. |
| Use of contact desensitization and shaping in the treatment of Dog Phobia and Generalized Fear of the Outdoors | 2010 | SE Glasscock<br>WE MacLean Jr                                                    | Case study.<br>Prospective.<br>Combination of contact desensitization, shaping and family counselling.                                                 | N=1<br>F age 6                       | “subsequently developed a phobic reaction to dogs and an avoidance of playing outdoors” after dog bite.<br>Consistent response to DS and shaping.<br>Study showed evidence that treatment needed maintenance to avoid reverting back.                                                                                                                                                                                                                                                                                                                                                                                                     |
| Microvascular replantation of a composite facial avulsion in a 24-month-child after dog bite                   | 2017 | D Macias<br>DI Kwon<br>PC Walker<br>NR Peterson                                  | Case study.<br>Retrospective.                                                                                                                          | N=1<br>F age 2                       | 8 months post-op “The patient’s mood and activity level had returned to pre-trauma baseline according to the patient’s mother.”                                                                                                                                                                                                                                                                                                                                                                                                                                                                                                           |
| Life-Threatening Panfacial Wild Dog Bites in a Child                                                           | 2021 | S Saha                                                                           | Case study.<br>Retrospective.                                                                                                                          | N=1<br>M age 1                       | “Psychologically, for the first 6 mo, he experienced severe bouts of panic attacks from loud noises,                                                                                                                                                                                                                                                                                                                                                                                                                                                                                                                                      |

|  |  |  |  |  |                                                                                                                                                                                                                                                                                                                          |
|--|--|--|--|--|--------------------------------------------------------------------------------------------------------------------------------------------------------------------------------------------------------------------------------------------------------------------------------------------------------------------------|
|  |  |  |  |  | especially the noises of lightning during storms.”<br>“He improved thereafter, and after 9 mo, while still avoiding all dogs, he would sometimes be fearful after hearing the noise of leaves rustling during high winds.”<br>“Otherwise, he recovered well under the supervision of a psychologist and a pediatrician.” |
|--|--|--|--|--|--------------------------------------------------------------------------------------------------------------------------------------------------------------------------------------------------------------------------------------------------------------------------------------------------------------------------|

Table 2 – Descriptive studies (larger than n=4), and cross-sectional studies, using both retrospective investigation and prospective follow-up, identified in searches of psychological consequences of dog bites to children.

| Paper title                                                                                                                              | Year | Author/s                                                     | Study design                                                                                                                                                                                                                                                                                                                                                                                                                                                                                                                    | Participants                                                                   | Psychological findings                                                                                                                                                                                                                                                                                                                                                                                                                                                                                                                                                                                           |
|------------------------------------------------------------------------------------------------------------------------------------------|------|--------------------------------------------------------------|---------------------------------------------------------------------------------------------------------------------------------------------------------------------------------------------------------------------------------------------------------------------------------------------------------------------------------------------------------------------------------------------------------------------------------------------------------------------------------------------------------------------------------|--------------------------------------------------------------------------------|------------------------------------------------------------------------------------------------------------------------------------------------------------------------------------------------------------------------------------------------------------------------------------------------------------------------------------------------------------------------------------------------------------------------------------------------------------------------------------------------------------------------------------------------------------------------------------------------------------------|
| Pediatric Dog Bite Victims: A Need for a Continuum of Care                                                                               | 2012 | B Boat<br>C Dixon<br>E Pearl<br>L Thieken<br>SE Bucher       | Descriptive study.<br>Prospective.<br>Inclusion criteria were 0Y-16Y with presenting complaint of “dog bite” to pediatric emergency department.<br>Parent completed a questionnaire after enrolment.<br>4 weeks later parents had 30 min phone interview.<br>Information obtained included: a) bite incident specifics, b) further medical/psychological care needed by child c) contact with additional agencies d) changes in the child’s behaviour e) changes in parental concerns f) parent feedback on additional services | N=34<br>50 enrolled,<br>34 completed follow-up<br>Mean age 8yrs,<br>21 M, 13 F | No patients were hospitalised.<br>70% of victims demonstrated concerning behaviours since incident (most commonly talking a lot about the incident (29%), being fearful of dogs (27%), avoiding dogs (27%), being anxious or worried about seeing doctors or going to hospital (24%), being fearful (24%), having nightmares (21%).<br>Parents also reported concerns (eg. feeling guilty (59%), worried about scars (59), fearful for child’s safety (44%).<br>No children received any psychological services.<br>50% of parents believed their children would benefit from interventions for help with fears. |
| Retrospective review of dog bite injuries in children presenting to a South Australian tertiary children’s hospital emergency department | 2014 | SC Chiam<br>NS Solanki<br>M Lodge<br>M Higgins<br>AL Sparnon | Descriptive study.<br>Retrospective.<br>Review of children presenting to ED between 2009-2011.                                                                                                                                                                                                                                                                                                                                                                                                                                  | N=277<br>Ages 0-17                                                             | 2 children referred to a psychologist for management of post-traumatic stress.                                                                                                                                                                                                                                                                                                                                                                                                                                                                                                                                   |
| Epidemiology of dog bites: A Belgian experience of                                                                                       | 2006 | T De Keuster<br>J Lamoureux<br>A Kahn                        | 3 studies conducted in Belgium on bites in children, of which one relevant to our review.                                                                                                                                                                                                                                                                                                                                                                                                                                       | Study 3<br>N=22                                                                | “Among the 22 children, 12 had shown symptoms of PTSD for more than one month; 5 had all                                                                                                                                                                                                                                                                                                                                                                                                                                                                                                                         |

|                                                                                                                    |      |                                                                                                 |                                                                                                                                                                                                                                                                                                                                        |                                              |                                                                                                                                                                                                                                                                                                                                                                                                                                                                                                                                                                                                      |
|--------------------------------------------------------------------------------------------------------------------|------|-------------------------------------------------------------------------------------------------|----------------------------------------------------------------------------------------------------------------------------------------------------------------------------------------------------------------------------------------------------------------------------------------------------------------------------------------|----------------------------------------------|------------------------------------------------------------------------------------------------------------------------------------------------------------------------------------------------------------------------------------------------------------------------------------------------------------------------------------------------------------------------------------------------------------------------------------------------------------------------------------------------------------------------------------------------------------------------------------------------------|
| canine behaviour and public health concerns                                                                        |      |                                                                                                 | Descriptive study. Prospective. Questionnaire delivered to parents of child victims of dog bites, 2-9 months after minor surgical treatment.                                                                                                                                                                                           | Median age 7.5 (range 1-14 years). 12 M,10 F | DSM-IV criteria for PTSD and 7 had some but not all criteria". Symptoms included vivid recollection and re-living, avoidance behaviours or numbing, increased arousal, hypervigilance, nightmares, difficulties sleeping, aggression to siblings and peers. No difference was found for presence of PTSD symptoms in regard to age, gender, time since the bite, type of dog, place of the accident, owner of the dog, child's activity at the time of the accident, or part of the child's body bitten. "Only the children who suffered severe and/or multiple bites developed full PTSD symptoms". |
| Origins of fear of dogs in adults and children: The role of conditioning processes and prior familiarity with dogs | 1991 | S Doogan<br>GV Thomas                                                                           | Analytical cross-sectional. Retrospective. Questionnaire to "investigate fear of dogs". Adults and children asked to recall origin of their fear. Using Geer's FSS-2. Chi square testing for significance.                                                                                                                             | N=100 adults<br>N=30 children (8-9 years)    | "No difference in the frequency of being bitten or chased reported by fearful vs non fearful groups". "Significantly more fearful than non-fearful adults reported little contact with dogs prior to the onset of their fear (no significant difference in children)".                                                                                                                                                                                                                                                                                                                               |
| Facial dog bite injuries in children: Retrospective study of 77 cases                                              | 2012 | B Hersant<br>S Cassier G<br>Constantinescu<br>P Gavelle<br>M -P Vazquez<br>A Picard<br>N Kadlub | Descriptive study. Retrospective. Study from 2002 to 2010. "We analyzed epidemiological, clinical data, surgical outcomes". Paper in French, only abstract available.                                                                                                                                                                  | N=77<br>Mean age 5.36yrs.                    | 35.1% of children had psychological problems afterward.                                                                                                                                                                                                                                                                                                                                                                                                                                                                                                                                              |
| Investigation of Posttraumatic Stress Disorder in Children after Animal-Induced Injury in China                    | 2010 | L Ji<br>Z Xiaowei<br>W Chuanlin<br>L Wei                                                        | Descriptive study. Prospective. Reviewed 358 charts and follow up data. "Family Apgar Scale assessment and PTSD screening were performed at ED admission". "On week 1 after ED admission the patient underwent evaluation for acute stress disorder diagnosis by using the Child Acute Stress Questionnaire". PTSD screening after 3M. | N=358<br>201 M<br>157 F<br>Mean age 9.4 yrs  | 38 met symptom criteria for ASD(Acute Stress Disorder). 19 patients developed PTSD - 10 of which had major injuries. No significant differences regarding gender/age. ASD early predictor of PTSD.                                                                                                                                                                                                                                                                                                                                                                                                   |

|                                                                                                                      |      |                                                                               |                                                                                                                                                                                                                                                                                                                                                                                                                                                                      |                                                                                                                                                    |                                                                                                                                                                                                                                                                                                                                                                                                                                                             |
|----------------------------------------------------------------------------------------------------------------------|------|-------------------------------------------------------------------------------|----------------------------------------------------------------------------------------------------------------------------------------------------------------------------------------------------------------------------------------------------------------------------------------------------------------------------------------------------------------------------------------------------------------------------------------------------------------------|----------------------------------------------------------------------------------------------------------------------------------------------------|-------------------------------------------------------------------------------------------------------------------------------------------------------------------------------------------------------------------------------------------------------------------------------------------------------------------------------------------------------------------------------------------------------------------------------------------------------------|
| Child victims of dog bites treated in emergency departments: a prospective study                                     | 2003 | A Kahn<br>P Bauche<br>J Lamoureux                                             | Descriptive study.<br>Prospective.<br>Children with dog bites from 6 Eds.<br>Pediatricians and nurses collected standardized information via questionnaire.                                                                                                                                                                                                                                                                                                          | N=100<br>Mean age<br>7.3 yrs<br>57 M, 43 F                                                                                                         | Two children were treated by a psychologist: one child bitten on the face at home, the other bitten on the leg in a public place and left alone without care.                                                                                                                                                                                                                                                                                               |
| Pediatric Craniofacial Fractures from Canine Bites                                                                   | 2021 | B Parent<br>MR Bykowski<br>FP Marji<br>S Ramgopal<br>JA Goldstein<br>JE Losee | Descriptive study.<br>Retrospective.<br>Included all pediatric dog bites between 2008-2019 at a single centre.<br>Selected cases with craniofacial fractures and described.                                                                                                                                                                                                                                                                                          | N=38 cases with craniofacial fractures described, of 3,602 paediatric dog bite encounters identified.<br>Age and gender for this group not stated. | Four patients (11%) subsequently diagnosed with PTSD, characterized mainly by recurring nightmares.<br>Two of these patients have required extensive counselling and anxiolytic medications.                                                                                                                                                                                                                                                                |
| Assessment of 16-month Sequelae Due to Dog Bites Originally Studied in a French Multicenter Survey from 2009 to 2011 | 2018 | G Pedrono<br>C Ricard<br>M Bouilly<br>C Beata<br>G Sarcey<br>B Thelot         | Descriptive study.<br>Prospective.<br>485 dog bites at 8 hospital EDs, followed up 16 M later (Sep 2010-Dec 2011).<br>Data collected by telephone or email                                                                                                                                                                                                                                                                                                           | N=298<br>Mean age<br>28.1 yrs,<br>42% <15yrs                                                                                                       | Adult and children findings not reported separately, however: 47% reported long term consequences, 16% of these being psychological 1/7 still experienced pain 16M after bite.<br>27% reported morale effected, higher for F (32%) than males (22%).<br><32% respondents reported being afraid of dogs after being bitten, slightly less frequent with children <15Y.                                                                                       |
| Posttraumatic Stress Disorder After Dog Bites in Children                                                            | 2003 | V Peters<br>M Sottiaux<br>J Appleboom<br>A Kahn                               | Descriptive study.<br>Prospective.<br>Between Apr 2001 – Feb 2002.<br>Child dog bite victims at pediatric ED .<br>Children under 16Y who received minor surgical treatment less than 48H after dog bite.<br>Parents agreed to do questionnaire 2-9M after bite.<br>Questionnaire with 60 items.<br>“Semistructured comprehensive interviews” by telephone.<br>8 questionnaires completed in further home visit.<br>“Statistical analyses were based on nonparametric | N=22<br>12 M, 10 F<br>Median age<br>7.5 yr                                                                                                         | 12/22 had PTSD symptoms for more than 1M, 5 had all DSM-IV criteria for PTSD; 7 children had some but not all criteria.<br>Symptoms included “vivid reviviscence of the traumatic event (12 children), avoidance behavior or numbing (7 children), and/or signs of increased arousal (6 children)”.<br>“Only the children who had severe and/or multiple bites had full PTSD symptoms; none of the children with an accidental bite from their pet did so.” |

|                                                                                                                                |      |                                                                     |                                                                                                                                                                                                                                                                                                                                                                                                                                                                                                                                                                                                                                                                        |                                                                                    |                                                                                                                                                                                                                                                                                                                                                                                                                                                                                                                                                                                                                                                                                                                                                                                                                                                                                                                                                                         |
|--------------------------------------------------------------------------------------------------------------------------------|------|---------------------------------------------------------------------|------------------------------------------------------------------------------------------------------------------------------------------------------------------------------------------------------------------------------------------------------------------------------------------------------------------------------------------------------------------------------------------------------------------------------------------------------------------------------------------------------------------------------------------------------------------------------------------------------------------------------------------------------------------------|------------------------------------------------------------------------------------|-------------------------------------------------------------------------------------------------------------------------------------------------------------------------------------------------------------------------------------------------------------------------------------------------------------------------------------------------------------------------------------------------------------------------------------------------------------------------------------------------------------------------------------------------------------------------------------------------------------------------------------------------------------------------------------------------------------------------------------------------------------------------------------------------------------------------------------------------------------------------------------------------------------------------------------------------------------------------|
|                                                                                                                                |      |                                                                     | tests and $\chi^2$ tests with Yates correction for small series”                                                                                                                                                                                                                                                                                                                                                                                                                                                                                                                                                                                                       |                                                                                    | None received psychological support.                                                                                                                                                                                                                                                                                                                                                                                                                                                                                                                                                                                                                                                                                                                                                                                                                                                                                                                                    |
| <p>1 Symptomatology and Adaptive Functioning for Children Exposed to Normative Stressors, Dog Attack and Parental Violence</p> | 1997 | BBR Rossman<br>RD Bingham<br>RN Emde                                | <p>2 Descriptive study. Prospective. 86 children aged 4-9 “interviewed after 3 types of aversive experience: repetitive exposure to parental violence, a dog attack, or mild stressor”. Parents completed (1) “family information and stressor structured interview”, (2) “impact of event PTSD adult symptom questionnaire”, (3) “PTSD Reaction Index”, (4) “Child dissociative checklist”, (5) “Life Events Questionnaire”, (6) “Children’s Behaviour Questionnaire”, (7) “Child Behaviour Checklist”. Children completed (1) “structured stressor interview”, (2) “PTSD reaction index”, (3) “Child Dissociative Index”, (4) “Peabody Picture Vocabulary Test”.</p> | <p>3 N=14 dog attack (DA) 10M 4F 4-6yrs n=4 7-9yrs n=10</p>                        | <p>4 “Parent report PTSD symptoms greater in both the DA and PV groups. Age and gender effects were significant for PTSD-Rl(p), showing greater symptoms for younger children and girls. However, interactions of group with age and gender showed that the overall age and gender trends occurred mainly in the DA group. In contrast, a group by gender interaction for child-reported PTSD symptoms and reflected in the DA group showed boys reporting more symptoms than girls. Interpretation of this result is complicated by the fact that although boys reported greater PTSD symptoms, parents observed girls to show higher symptom levels. Mothers observed girls to have greater PTSD symptoms and boys to have greater dissociative symptoms, while child report showed boys to have greater PTSD symptoms. Mothers’ PTSD symptoms significantly or marginally predicted greater child internalising behaviour problems and lower social competence.”</p> |
| <p>5 Psychological Adjustment in Children after Traumatic Disfiguring Injuries: A 12-Month Follow-Up</p>                       | 2000 | MD Rusch,<br>BK Grunert<br>JR Sanger<br>WW Dzwierzynski<br>H Matlob | <p>6 Descriptive study. Prospective. Children treated in plastic and reconstructive surgery department for traumatic facial or extremity injuries, which included dog bites. Psychological evaluations performed within 4 days of injury. Interviews for children and parents (structured). Follow ups done at 1, 3, 6 and 12 month intervals.</p>                                                                                                                                                                                                                                                                                                                     | <p>7 N=57 Age 3-12 yrs 40 M, 17 F Not known which children suffered dog bites.</p> | <p>8 “Within 5 days of the traumatic event, 98 percent of the children were symptomatic for post traumatic stress disorder, depression or anxiety” (all but one child). “One month after the injury, 82 percent were symptomatic”. “44 percent of the children continued to report symptoms at 12-month follow-up-visits,</p>                                                                                                                                                                                                                                                                                                                                                                                                                                                                                                                                                                                                                                           |

|                                                                                                                      |      |                                                                                             |                                                                                                                                                                                                                                                                                |                                                                             |                                                                                                                                                                                                                                                                                                                                                                                                                                                                                                                                                                                                                                                                                         |
|----------------------------------------------------------------------------------------------------------------------|------|---------------------------------------------------------------------------------------------|--------------------------------------------------------------------------------------------------------------------------------------------------------------------------------------------------------------------------------------------------------------------------------|-----------------------------------------------------------------------------|-----------------------------------------------------------------------------------------------------------------------------------------------------------------------------------------------------------------------------------------------------------------------------------------------------------------------------------------------------------------------------------------------------------------------------------------------------------------------------------------------------------------------------------------------------------------------------------------------------------------------------------------------------------------------------------------|
|                                                                                                                      |      |                                                                                             | Categories assessed: reexperiencing symptoms, avoidance of thoughts/conversations promoting memory of incident, impaired attention/concentration, reaction to disfigurement, phantom pain.                                                                                     |                                                                             | and 21 percent met the diagnostic criteria for posttraumatic stress disorder". 37% children reported fear of dying. 75% children reported fear of re-injury. Children still experiencing fear of re-injury after 12M reduced partaking in "risky" or highly physical behaviours. No statistical significance in age. "82% of 17 girls (n=14) reported flashbacks at their 1-month follow up visits, compared with 45% of the 40 boys (n=18)(p=0.018). At the 12M follow up visits these differences no longer existed". "44% of our subjects exhibited significant long term psychological symptoms after their injuries that were directly attributable to their accidental injuries". |
| Analysis of Dog Bites in Children Who Are Younger Than 17 Years                                                      | 2006 | J Schalamon<br>H Ainoedhofer<br>G Singer<br>T Petnehazy<br>J Mayr<br>K Kiss<br>ME Hollwarth | Descriptive study. Retrospective/prospective. Review of medical charts of children under 17Y who sought medical attention for a dog bite between 1994-2003 at pediatric surgery department. Follow-up of 93% of the children 2-11 years after the dog attack (mean 7.2 years). | N=341<br>174 M, 167 F<br>Mean age 5.9yrs.                                   | 5 children complaining of nightmares after incidents. Fear of dogs remained in 34 children during long-term follow-up.                                                                                                                                                                                                                                                                                                                                                                                                                                                                                                                                                                  |
| Antecedents and consequences of pediatric dog bite injuries and their developmental trends: 101 cases in rural China | 2014 | J Shen<br>S Li<br>H Xiang<br>S Lu<br>D C Schwebel                                           | Descriptive study. Retrospective. All families had a dog bite victim under 18Y in the last 12 months. Structured interview with caregiver.                                                                                                                                     | N=101<br>65% Male<br>Mean age 8.3 yrs                                       | Children were reported to be generally unwilling to approach dogs after the incident and children tended to fear dogs to some degree after the incident.                                                                                                                                                                                                                                                                                                                                                                                                                                                                                                                                |
| Epidemiology and classification of dog bite injuries to the face: A prospective study of 108 patients                | 2015 | G Toure<br>G Angoulangouli<br>J-P Meningaud                                                 | Descriptive study. Prospective. Study carried out over 13 years of dog bite intake to emergency surgeries. Information sheet filled out by victims bitten on the face.                                                                                                         | 108 incidents of dog bites (to face and neck) out of 13021 patients<br>49 M | 23% encountered complications, of which 20% were psychological shock (anxiety and post-traumatic stress, sleep disorder, phobia of dogs and the patients own image).                                                                                                                                                                                                                                                                                                                                                                                                                                                                                                                    |



1  
2  
3  
4  
5  
6  
7  
8  
9  
10  
11  
12  
13  
14  
15  
16  
17  
18  
19  
20  
21  
22  
23  
24  
25  
26  
27  
28  
29  
30  
31  
32  
33  
34  
35  
36  
37  
38  
39  
40  
41  
42  
43  
44  
45  
46  
47  
48  
49  
50  
51  
52  
53  
54  
55  
56  
57  
58  
59  
60

|  |  |  |  |                    |  |
|--|--|--|--|--------------------|--|
|  |  |  |  | 59 F<br>69% <16yrs |  |
|--|--|--|--|--------------------|--|

Confidential: For Review Only

1  
2  
3  
4  
5  
6  
7  
8  
9  
10  
11  
12  
13  
14  
15  
16  
17  
18  
19  
20  
21  
22  
23  
24  
25  
26  
27  
28  
29  
30  
31  
32  
33  
34  
35  
36  
37  
38  
39  
40  
41  
42  
43  
44  
45  
46  
47  
48  
49  
50  
51  
52  
53  
54  
55  
56  
57  
58  
59  
60

Confidential: For Review Only

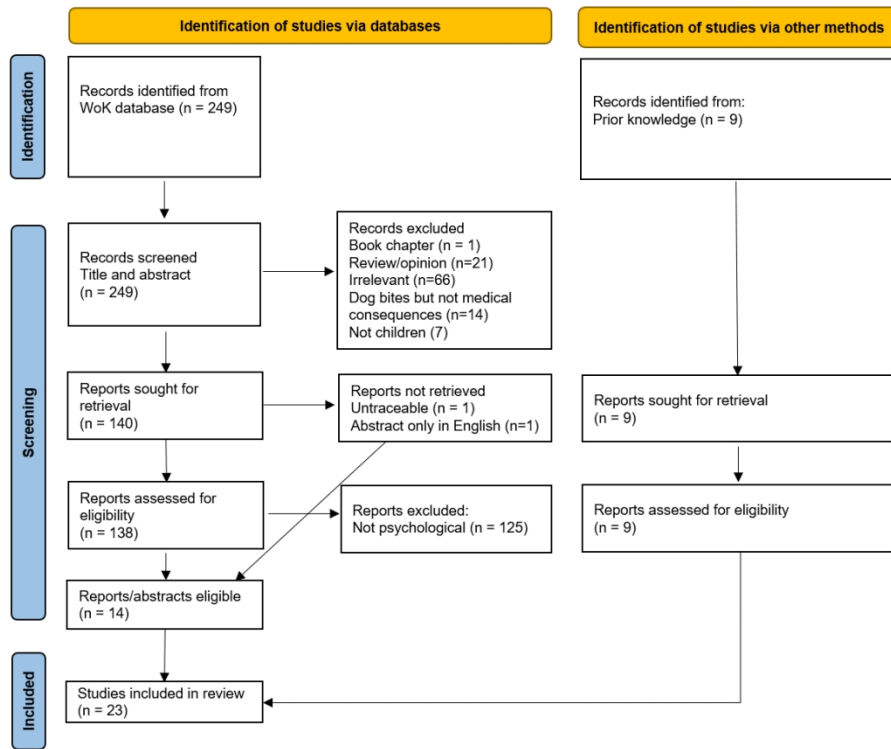

Figure 1. Flow chart of study search and screening process for studies of psychological consequences of dog bites to children

558x448mm (59 x 59 DPI)

# BMJ Paediatrics Open

---

## A review of psychological effects of dog bites in children

|                               |                                                                                                                                                                                                                                                                                                                                                                                                                   |
|-------------------------------|-------------------------------------------------------------------------------------------------------------------------------------------------------------------------------------------------------------------------------------------------------------------------------------------------------------------------------------------------------------------------------------------------------------------|
| Journal:                      | <i>BMJ Paediatrics Open</i>                                                                                                                                                                                                                                                                                                                                                                                       |
| Manuscript ID                 | bmjpo-2020-000922.R1                                                                                                                                                                                                                                                                                                                                                                                              |
| Article Type:                 | Review                                                                                                                                                                                                                                                                                                                                                                                                            |
| Date Submitted by the Author: | 16-May-2024                                                                                                                                                                                                                                                                                                                                                                                                       |
| Complete List of Authors:     | Westgarth, Carri; University of Liverpool Faculty of Health and Life Sciences, Department of Livestock and One Health; University of Liverpool<br>Provazza, Serena; Alder Hey Children's NHS Foundation Trust, Department of Clinical Health Psychology<br>Nicholas, Jade; Independent Researcher<br>Gray, Victoria; Alder Hey Children's Hospital NHS Foundation Trust, Department of Clinical health Psychology |
| Keywords:                     | Child Health, Adolescent Health, Psychology                                                                                                                                                                                                                                                                                                                                                                       |
|                               |                                                                                                                                                                                                                                                                                                                                                                                                                   |

SCHOLARONE™  
Manuscripts



I, the Submitting Author has the right to grant and does grant on behalf of all authors of the Work (as defined in the below author licence), an exclusive licence and/or a non-exclusive licence for contributions from authors who are: i) UK Crown employees; ii) where BMJ has agreed a CC-BY licence shall apply, and/or iii) in accordance with the terms applicable for US Federal Government officers or employees acting as part of their official duties; on a worldwide, perpetual, irrevocable, royalty-free basis to BMJ Publishing Group Ltd ("BMJ") its licensees and where the relevant Journal is co-owned by BMJ to the co-owners of the Journal, to publish the Work in this journal and any other BMJ products and to exploit all rights, as set out in our [licence](#).

The Submitting Author accepts and understands that any supply made under these terms is made by BMJ to the Submitting Author unless you are acting as an employee on behalf of your employer or a postgraduate student of an affiliated institution which is paying any applicable article publishing charge ("APC") for Open Access articles. Where the Submitting Author wishes to make the Work available on an Open Access basis (and intends to pay the relevant APC), the terms of reuse of such Open Access shall be governed by a Creative Commons licence – details of these licences and which [Creative Commons](#) licence will apply to this Work are set out in our licence referred to above.

Other than as permitted in any relevant BMJ Author's Self Archiving Policies, I confirm this Work has not been accepted for publication elsewhere, is not being considered for publication elsewhere and does not duplicate material already published. I confirm all authors consent to publication of this Work and authorise the granting of this licence.

## A review of psychological effects of dog bites in children

Westgarth, Carri<sup>1</sup>., Provazza, Serena<sup>2</sup>., Nicholas, Jade.<sup>3</sup>, Gray, Victoria<sup>2</sup>.

1 Department of Livestock and One Health, Institute of Infection, Veterinary and Ecological Sciences, University of Liverpool, Leahurst Campus, Neston, Cheshire, CH66 1QU, UK

2 Department of Clinical Health Psychology, Alder Hey Children's NHS Foundation Trust, Eaton Road, Liverpool, Merseyside, L12 2AP, UK.

3 Independent Researcher, Hampshire, UK.

### ABSTRACT

#### Background

Dog bites are a concerning health problem in children and one of the leading causes of non-fatal injuries in this population. Dog attacks not only cause physical injuries but can also lead to long-term psychological problems. A review was performed to investigate the scope of literature on psychological effects of dog bites on a paediatric population.

#### Methods

A literature search was performed on Web of Knowledge database between 1982-June 2023, returning 249 results. 14 primary studies reporting the psychological consequences of dog bites in children or adolescents were classed as eligible and 9 further studies added from prior knowledge and bibliographical searches. 23 studies involving 1894 participants met the criteria and were included in this review.

#### Results

Of these 23 studies, 8 were case studies or small case series reports (up to n=4), 14 larger descriptive studies, and 1 analytical cross-sectional study. There was a mixture of retrospective and prospective data-gathering. The most common psychological consequences of dog bites in children were post-traumatic stress disorder, dog phobia, nightmares and symptoms of anxiety and avoidance behaviours.

## Conclusions

Studies on dog bites in a paediatric population with a specific focus on the psychological consequences associated with dog bites and their management are sparse. Future research and practice should more greatly consider the psychological impact in child victims of dog bites and their family members, as well as their management to avoid development of mental health issues and improve their quality of life. Future research also needs to ascertain the efficacy of using Virtual Reality in treating children with dog phobia.

## KEY MESSAGES

- Psychological consequences of dog bites to children are common but under-researched and often overlooked.
- Typical consequences of dog bites are post-traumatic stress disorder, dog phobia, nightmares and symptoms of anxiety and avoidance behaviours.
- Treatment of dog phobias can be challenging to deliver.
- Virtual reality offers a potential ethical and safe, controlled environment for cognitive behavioural therapy regarding dogs.

## INTRODUCTION

Dog ownership is argued to provide some health benefits<sup>1-3</sup>, however, dogs, as well as other animals, may cause severe injuries to humans. Although there are no global estimates of dog bites incidence, the World Health Organization reports dog bites account for tens of millions of injuries annually<sup>4</sup>. As a result, dog bites represent a major public health concern, affecting predominately the paediatric population<sup>5</sup>. In the UK, incidence of hospital admissions for dog bites in children (14 or under) is stable at approximately 14.4 per 100,000 population per year<sup>5</sup>.

1  
2  
3 It is well established that most of the child dog bite victims are bitten inside the home, and most  
4  
5 dogs involved are known to the victim <sup>6,7</sup>. The COVID-19 global pandemic and the subsequent  
6  
7 implementation of lockdowns with a 'stay at home' order forced children to spend more time than  
8  
9 usual at home with a significant increase in dog bites <sup>8,9</sup>.

10  
11  
12  
13  
14 Some evidence supports that children are more vulnerable to dog attacks compared to adults  
15  
16 because of their smaller physical size, their underestimation of risk and their tendency to behave  
17  
18 more impulsively <sup>10</sup>, as well as leaning-in behaviour with animals in young children <sup>11</sup>. Rates of  
19  
20 admission peak in the 5-9 age group <sup>8</sup>. Furthermore, children are often injured in the neck and head  
21  
22 regions and many have facial wounds <sup>12-14</sup>. The younger the child the more frequent the bites are to  
23  
24 the face <sup>14,15</sup> and young children have more extensive/severe injuries <sup>13,16</sup>.

25  
26  
27  
28  
29  
30 In addition to physical impact, dog bites often carry health care costs <sup>8</sup>. They also produce  
31  
32 psychological costs to the victims and other parties involved <sup>17-19</sup>, however, compared to physical,  
33  
34 psychological consequences of dog bites and their management is still scarcely investigated and  
35  
36 poorly reported <sup>20,21</sup>. Timely recognition of psychological symptoms caused by dog attacks in  
37  
38 children and subsequent psychological support to the child victims and their families would be of  
39  
40 critical importance to prevent development of future mental health issues, which would in turn  
41  
42 influence the quality of life of the children and their caretakers. The aim of this systematic review  
43  
44 was to explore current evidence on the psychological impact of dog bites in children and  
45  
46 adolescents.  
47  
48  
49  
50  
51

## 52 53 **METHODS**

### 54 55 Protocol and inclusion criteria

56  
57  
58 This review was conducted according to the standards established by the Preferred Reporting Items  
59  
60 for Systematic Reviews <sup>22</sup>.



1  
2  
3  
4  
5 A search of Web of Science Core Collection database was performed to identify original research  
6 articles focusing on psychological consequences of dog bite injuries in the paediatric population  
7  
8 from 1982- June 2023. This single popular database was chosen due to time constraints and its  
9  
10 broad coverage of science, social sciences and arts and humanities. The search term used on all  
11  
12 fields was:  
13  
14

15  
16 ("child\* OR pediatric") AND (dog\* OR cani\*) AND (bit\* OR attack\*) AND  
17  
18 (psychological OR PTSD OR phobia OR trauma\* OR anxiety)  
19  
20  
21  
22

23  
24 At least the abstract needed to be available in English for assessment for relevant inclusion, and  
25  
26 screening was performed by CW and SP. Articles were excluded if: they were not an original  
27  
28 primary source of evidence in a scientific journal (ie book chapter or review papers were excluded);  
29  
30 the study population did not include children (ie under 18 years of age, although it could also  
31  
32 include adults); studies focused on bites in general (e.g., human bites, cat bites etc) rather than dog;  
33  
34 the information reported was not specific to psychological effects of dog bites but rather on dog  
35  
36 bites in general (e.g., wound management, dog bite incidence etc). Articles were excluded based on  
37  
38 reading the full paper if the title or abstract did not already clearly exclude it; if the study purpose  
39  
40 and population was deemed relevant, often the full paper needed to be read in order to find if  
41  
42 psychological effects had been reported. Further relevant studies were also identified from  
43  
44 bibliographic searches and prior knowledge. See Figure 1 for study search and inclusion flowchart.  
45  
46 Relatively few studies met the inclusion criteria and thus sample size was low. In addition, the  
47  
48 study designs found would be classed as low-level of evidence (such as case studies, descriptive  
49  
50 case series and cross-sectional studies). For these reasons all studies and their findings have been  
51  
52 reported here rather than exclusion based on quality. Evaluation and summary of the study design  
53  
54 and psychological findings was performed by CW and JN.  
55  
56  
57  
58  
59  
60

## RESULTS

Out of 249 papers screened for eligibility, 14 studies met the criteria and were included in this review, along with 9 other studies identified through prior knowledge and bibliographies, totalling 23 studies involving 1894 participants (Figure 1). Of these 23 studies, eight were single case studies or small case series (up to 4 children per report)<sup>23-30</sup> (Supplementary Materials Table 1). Thirteen were descriptive studies of larger patient groups<sup>7 15 18 19 31-39</sup>, one was a case-control study but the psychological findings were only descriptive<sup>40</sup>, and one was an analytical cross-sectional study<sup>41</sup> (Supplementary Materials Table 2 and 3). A mixture of retrospective (ie incidental review of past case records, survey regarding fear of dogs, see Supplementary Materials Table 2) and prospective data collection (deliberate interview of dog bite cases as they attended hospital, follow-up interview of a cohort of bitten children, see Supplementary Materials Table 3) methods were reported depending on the study, and sometimes both.

### Effects on children

One study specific to dog bite patients estimated that 70% of children had demonstrated concerning behaviours since the incident<sup>37</sup>. Post-traumatic Stress Disorder, (PTSD) was mentioned in eight studies: 2 of 4 children (a family in which one child was bitten)<sup>23</sup>, diagnosed in a case study<sup>28</sup>, diagnosed in descriptive studies of dog bite patients at a prevalence of 12/22<sup>31</sup>, 12/22<sup>19</sup>, 19/358<sup>18</sup>; 98% within 5 days of a traumatic facial incident some of which were dog bites<sup>35</sup>, and also mentioned more generally in two other studies, one which included (16%) child dog bite patients<sup>34</sup> and one specifically of child dog bites<sup>36</sup>. PTSD was typically diagnosed through use of a screening questionnaire or meeting six major criteria under DSM-IV. Acute Stress Disorder (ASD) was also mentioned (38/358 patients in<sup>18</sup>) and observed to be an early indicator of PTSD. In a study of children interviewed after a traumatic experience (16% of which were dog bites), PTSD symptoms were greater in the dog attack and parental violence groups than the 'mild stressor' group, and mothers of bitten children were also observed to develop PTSD which was associated with child

1  
2  
3 PTSD score as reported by the parent<sup>34</sup>. In addition, in the dog attack group mothers observed girls  
4 to have greater PTSD symptoms and boys to have greater dissociative symptoms, while child self-  
5 report showed boys to have greater PTSD symptoms. Other studies did not find evidence of  
6 gender/age effects in regards to PTSD in child dog bites<sup>18 31</sup>. The severity of the symptoms seemed  
7 to be related to the severity of the attacks; children who sustained more physically severe or  
8 multiple bites were more likely to develop PTSD symptoms<sup>18 19 31</sup>.

9  
10  
11  
12  
13  
14  
15  
16  
17  
18  
19 Other than formally reporting PTSD/ASD, specific symptoms most commonly described in the  
20 articles were fearfulness/avoidance of dogs<sup>24 25 27 30 33 36-39</sup> and sleep disturbance/nightmares<sup>23-25 31</sup>  
21  
22  
23  
24  
25  
26  
27  
28  
29  
30  
31  
32  
33  
34  
35  
36  
37  
38  
39  
40  
41  
42  
43  
44  
45  
46  
47  
48  
49  
50  
51  
52  
53  
54  
55  
56  
57  
58  
59  
60  
Other symptoms included bed wetting<sup>23 25</sup>, selective mutism<sup>28</sup>, traumatic memories/re-  
living<sup>19 28 31</sup>, talking a lot about the incident<sup>37</sup>, increased arousal<sup>19 31</sup>, anger/aggression<sup>24 31</sup>,  
withdrawn/depressed/numbing<sup>19 28 31 35</sup>, fearful<sup>37</sup>, panic attacks<sup>27</sup>, anxiety<sup>35 36</sup>, hypervigilance<sup>31</sup>,  
difficulty playing/avoidance of playing outdoors<sup>24 30</sup>, anxiety about hospitals<sup>37</sup>, fear of dying or re-  
injury<sup>35</sup>, and phobia of own image<sup>36</sup>.

### Effects on parents

Notably, parents reported changes in their behaviours as well, proving that dog bites represent a  
burden not only for the victims but also for their family<sup>34 37</sup>. Parents described feeling shaken<sup>25</sup>,  
guilty, fearful for child's safety and worried about scars<sup>37</sup>.

### Treatment of children

Despite the reporting of psychological symptoms after dog bites in children, it was rare for  
psychological treatment to be recorded; although it featured in case studies<sup>23 25 27-30</sup>, when  
evaluating descriptive studies it was only reported in 2/100<sup>15</sup>, 2/277<sup>7</sup>, 2/38<sup>40</sup> patients. Indeed, two  
studies specifically noted no children received any psychological services (0/22<sup>19</sup>; 0/34<sup>37</sup>) but 50%  
of parents felt it would be helpful<sup>37</sup>.

## Other observations

Hon et al (2007) acknowledged that one challenge to collecting these data is that in an emergency department service where dog bites present is it might be difficult to gather information about psychological and emotional trauma <sup>21</sup>. Clearly there is an unidentified gap in both the literature and patient need for psychological assessment. In addition it has been suggested that interventions should also include educational programmes on the risk and severity of dog attacks offered to parents and children, given dog bites can have significant psychological consequences that can negatively impact on children quality of life <sup>29</sup>.

## DISCUSSION

The main purpose of this review was to explore the current literature on paediatric dog bites, with a specific focus on the psychological impacts of dog bites in children, as the psychological consequences of dog bites as well as their treatment are often overlooked <sup>20 21</sup>. Evidence suggested that children bitten by dogs are at high risk of developing psychological disturbances, ranging from fear of dogs to clinical PTSD, however, few studies mentioned psychological management or treatment offered after dog attacks. It appears that assessing children in an emergency department (ED) to evaluate psychological sequelae following dog bites, and further offering them psychological support, can be difficult and/or lacks consideration. This may result in psychological symptoms significantly impacting children and potentially worsening. A form of follow-up assessment is likely to be required to assess whether initial symptoms of psychological distress have settled, but whom this responsibility falls to once a patient is discharged from the ED, is unclear. Further, not only did dog injuries have an impact on the victims, but they also affected their carers. Psychological symptoms showed by young victims of dog bites seemed to be long lasting with some studies reporting over 12 months. Age and gender differences were inconclusive between

1  
2  
3 studies but across studies more severe bites commonly resulted in more serious psychological  
4  
5 impact.  
6  
7  
8  
9

10 It has become increasingly recognised that there is a need and opportunity to evaluate victims of  
11 traumatic injuries for psychological distress so that they can be appropriately referred on. For  
12 example this can occur during physical treatment such as plastic surgery.<sup>42</sup> However, it is clear from  
13 our review that many children who have been bitten by dogs or are otherwise fearful of dogs may  
14 benefit from psychological screening and if required, treatment, but this does not appear to be  
15 regularly occurring in practice. This is particularly concerning given children are in a crucial  
16 developmental stage with varied levels of supportive systems and resilience, and PTSD is a  
17 common psychiatric disorder after a child has a traumatic experience.<sup>43</sup>  
18  
19  
20  
21  
22  
23  
24  
25  
26  
27  
28  
29

30 Although different approaches have been found to be effective in treating results of trauma and in  
31 particular phobia of dogs in children, CBT (cognitive behavioural therapy) regarding some form of  
32 graded exposure appears to be the most widely utilised<sup>44 45</sup>. A difficulty with this is the ethical and  
33 practical safety implications regarding controlled exposure to real animals who can be difficult to  
34 access, unpredictable and to some extent uncontrollable in their behaviours, and with their own  
35 welfare considerations<sup>46</sup>. For example, one intervention states *“Parents were not provided with*  
36 *explicit instructions on how to find dogs but were encouraged to consider various options: dogs*  
37 *owned by extended family members, neighbors, and friends; dogs at pet stores, breeders, and*  
38 *animal shelters; dogs at the park or other recreation areas”*<sup>45</sup>. Another play-based intervention  
39 used dogs with handlers within the intensive session, with no description about how these had been  
40 assessed for suitability, and *“during the session, the child was encouraged to engage in a range of*  
41 *different tasks with each dog including approaching and patting the dog, offering the dog treats and*  
42 *walking the dog on the lead”*<sup>44</sup>. Great care must be taken in order to be able to gradually control the  
43 intensity of exposure and also safeguard both child and animal welfare during such treatment so that  
44  
45  
46  
47  
48  
49  
50  
51  
52  
53  
54  
55  
56  
57  
58  
59  
60

1  
2  
3 neither becomes overwhelmed and both have a positive experience. This includes providing very  
4 clear guidance to those delivering it, including parents.  
5  
6  
7  
8  
9

10 A potential more ethical solution to these challenges during the intensive and early stages of therapy  
11 would be to use virtual reality <sup>46</sup>. This would allow a gradual and controlled increase in exposure to  
12 particular dog behaviours required for that case. For example, Farrel (2021) have suggested the use  
13 of Virtual Reality therapy in treating dog phobia can be possible using just one treatment session <sup>47</sup>.  
14 In eight children with specific phobia of dogs, after one month follow-up, 75% of the children were  
15 considered recovered. The authors concluded that VR can be effectively be used as an alternative to  
16 the classic in-vivo exposure-based therapy and might overcome some of its challenges as the most  
17 difficult CBT technique to deliver. More research is needed to confirm the efficacy of VR as an  
18 effective treatment of dog fear in a paediatric population.  
19  
20  
21  
22  
23  
24  
25  
26  
27  
28  
29  
30  
31  
32

33 This review has the merit of investigating and summarising existing evidence on psychological  
34 effects of paediatric dog bites and their management, as to the best of our knowledge, such  
35 investigation has not been conducted before. However, it presents with some limitations. First of  
36 all, even though the literature search was performed on a highly relevant database, it was only a  
37 single database and some studies may be missing from this review. Additionally, of the few studies  
38 identified, many had a very limited sample size, which may limited the statistical power and  
39 generalizability of the findings. They also mostly used study designs with a high risk of bias, such  
40 as case studies, and descriptive cross-sectional studies, often with retrospective data collection  
41 simply reviewing case notes. For example, unless it was particularly noted because a parent or child  
42 raised the issue, psychological impacts may have remained unreported. Those studies of a  
43 potentially lower risk of bias that used prospective data collection still varied in quality of screening  
44 methods for psychological outcomes and whether follow-up was used. Therefore, the conclusions  
45  
46  
47  
48  
49  
50  
51  
52  
53  
54  
55  
56  
57  
58  
59  
60

1  
2  
3 drawn here should be taken with caution. Notwithstanding the above limitations, this review  
4  
5 provides an insight into the psychological consequences of paediatric dog bites.  
6  
7  
8  
9

10 To conclude, dog bites in children represent a traumatic event, which can cause devastating  
11  
12 psychological consequences in the victims and in their families. A thorough investigation of the  
13  
14 psychological impact of dog bites on children and their parents followed by a prompt  
15  
16 multidisciplinary management of both physical and psychological symptoms would lead to better  
17  
18 outcomes, preventing the occurrence of more severe mental health problems such as phobia and  
19  
20 PTSD and improve the quality of life of the victims and their families. Furthermore, educational  
21  
22 programmes on the risk and severity of dog attacks should be offered to parents and children, to  
23  
24 prevent dog bites. Cognitive behavioural therapy can be used to treat fear of dogs in children, with  
25  
26 VR representing an alternative to the classic in vivo exposition therapy that requires more  
27  
28 investigation. Future research should focus more on the psychological impact of dog injuries and  
29  
30 on the treatment of child victims of dog bites and their family members, to avoid development of  
31  
32 mental health issues and improve their quality of life.  
33  
34  
35  
36  
37  
38  
39

#### 40 **FUNDING**

41  
42 This work was supported by the Faculty of Health and Life Sciences, University of Liverpool.  
43

#### 44 **COMPETING INTERESTS**

45  
46 CW is a member of the Merseyside Dog Safety Partnership, which has a website containing useful  
47  
48 resources for dog bite prevention. [www.merseydogsafe.co.uk](http://www.merseydogsafe.co.uk). There are no other competing  
49  
50 interests to declare.  
51  
52

#### 53 **RESEARCH ETHICS APPROVAL**

54  
55 Not applicable - this study does not involve human participants.  
56  
57

#### 58 **CONTRIBUTORS**

CW conceptualised the paper. CW and SP performed the searches and paper selection. CW and JN reviewed the papers and assimilated the data. CW and SP wrote the first draft. All authors including VG commented on and revised the paper. CW submitted the paper. CW is responsible for the content as guarantor.

## DATA AVAILABILITY

No other datasets were generated.

## PATIENT CONSENT FOR PUBLICATION

Not applicable.

## PROVENANCE AND PEER REVIEW

Commissioned; externally peer reviewed.

## REFERENCES

1. Herzog H. The Impact of Pets on Human Health and Psychological Well-Being: Fact, Fiction, or Hypothesis? *Current Directions in Psychological Science* 2011;20:236-39.
2. O'Haire M. Companion animals and human health: Benefits, challenges, and the road ahead. *Journal of Veterinary Behaviour* 2010;5:226-34.
3. Rodriguez KE, Herzog H, Gee NR. Variability in Human-Animal Interaction Research. *Front Vet Sci* 2021;7:9. doi: 10.3389/fvets.2020.619600
4. WHO. Animal Bites: World Health Organisation; 2018 [cited 2024 9th January]. Available from: <https://www.who.int/news-room/fact-sheets/detail/animal-bites>.
5. Tulloch JSP, Owczarczak-Garstecka SC, Fleming KM, et al. English hospital episode data analysis (1998–2018) reveal that the rise in dog bite hospital admissions is driven by adult cases. *Scientific Reports* 2021;11(1):1767. doi: 10.1038/s41598-021-81527-7
6. Cornelissen JMR, Hopster H. Dog bites in The Netherlands: A study of victims, injuries, circumstances and aggressors to support evaluation of breed specific legislation. *Veterinary Journal* 2010;186(3):292-98. doi: 10.1016/j.tvjl.2009.10.001
7. Chiam SC, Solanki NS, Lodge M, et al. Retrospective review of dog bite injuries in children presenting to a South Australian tertiary children's hospital emergency department. *J Paediatr Child Health* 2014;50(10):791-4. doi: 10.1111/jpc.12642 [published Online First: 2014/07/22]
8. Tulloch JSP, Minford S, Pimblett V, et al. Paediatric emergency department dog bite attendance during the COVID-19 pandemic: an audit at a tertiary children's hospital. *BMJ paediatrics open* 2021;5(1):e001040-e40. doi: 10.1136/bmjpo-2021-001040
9. Parente G, Gargano T, Di Mitri M, et al. Consequences of COVID-19 Lockdown on Children and Their Pets: Dangerous Increase of Dog Bites among the Paediatric Population. *Children (Basel)* 2021;8(8) doi: 10.3390/children8080620 [published Online First: 2021/08/28]
10. Shen J, Rouse J, Godbole M, et al. Systematic Review: Interventions to Educate Children About Dog Safety and Prevent Pediatric Dog-Bite Injuries: A Meta-Analytic Review. *J Pediatr Psychol* 2017;42(7):779-91. doi: 10.1093/jpepsy/jsv164



1  
2  
3  
4  
5  
6  
7  
8  
9  
10  
11  
12  
13  
14  
15  
16  
17  
18  
19  
20  
21  
22  
23  
24  
25  
26  
27  
28  
29  
30  
31  
32  
33  
34  
35  
36  
37  
38  
39  
40  
41  
42  
43  
44  
45  
46  
47  
48  
49  
50  
51  
52  
53  
54  
55  
56  
57  
58  
59  
60

11. Meints K, Syrnyk C, De Keuster T. Why do children get bitten in the face? *Injury Prevention* 2010;16(Suppl 1):A172-A73. doi: 10.1136/ip.2010.029215.617
12. Kasbekar AV, Garfit H, Duncan C, et al. Dog bites to the head and neck in children; an increasing problem in the UK. *Clinical Otolaryngology* 2013;38(3):259-62. doi: 10.1111/coa.12094
13. Khan K, Horswell BB, Samanta D. Dog-Bite Injuries to the Craniofacial Region: An Epidemiologic and Pattern-of-Injury Review at a Level 1 Trauma Center. *Journal of Oral and Maxillofacial Surgery* 2020;78(3):401-13. doi: <https://doi.org/10.1016/j.joms.2019.11.002>
14. Sribnick EA, Sarda S, Sawvel MS, et al. Dog bite injuries in children: Clinical implications for head involvement. *Trauma* 2016;18(3):210-15. doi: 10.1177/1460408616631772
15. Kahn A, Bauche P, Lamoureux J, et al. Child victims of dog bites treated in emergency departments: a prospective survey. *European Journal of Pediatrics* 2003;162(4):254-58. doi: 10.1007/s00431-002-1130-6
16. Brogan TV, Bratton SL, Dowd MD, et al. SEVERE DOG BITES IN CHILDREN. *Pediatrics* 1995;96(5):947-50.
17. Westgarth C, Watkins F. Chapter 23: Impact of dog aggression on victims. In: Mills DS, Westgarth C, eds. *Dog Bites: A Multidisciplinary Perspective*. 1st Edition ed. Sheffield: 5M Publishing 2017:309-20.
18. Ji L, Xiaowei Z, Chuanlin W, et al. Investigation of posttraumatic stress disorder in children after animal-induced injury in China. *Pediatrics* 2010;126(2):e320-4. doi: 10.1542/peds.2009-3530 [published Online First: 2010/07/14]
19. Peters V, Sottiaux M, Appelboom J, et al. Posttraumatic stress disorder after dog bites in children. *The Journal of Pediatrics* 2004;144(1):121-22. doi: <http://dx.doi.org/10.1016/j.jpeds.2003.10.024>
20. Jakeman M, Oxley JA, Owczarczak-Garstecka SC, et al. Pet dog bites in children: management and prevention. *BMJ Paediatrics Open* 2020;4(1):e000726. doi: 10.1136/bmjpo-2020-000726
21. Hon KLE, Fu CCA, Chor CM, et al. Issues associated with dog bite injuries in children and adolescents assessed at the emergency department. *Pediatric Emergency Care* 2007;23(7):445-49.
22. Page MJ, McKenzie JE, Bossuyt PM, et al. The PRISMA 2020 statement: an updated guideline for reporting systematic reviews. *BMJ* 2021;372:n71. doi: 10.1136/bmj.n71
23. Albano AM, Miller PP, Zarate R, et al. Behavioral assessment and treatment of PTSD in prepubertal children: Attention to developmental factors and innovative strategies in the case study of a family. *Cognitive and Behavioral Practice* 1997;4(2):245-62. doi: [https://doi.org/10.1016/S1077-7229\(97\)80003-X](https://doi.org/10.1016/S1077-7229(97)80003-X)
24. Drell MJ, Gaensbauer TJ, Siegel CH, et al. Clinical round table: A case of trauma to a 21-month-old girl. *Infant Mental Health Journal* 1995;16(4):318-33. doi: [https://doi.org/10.1002/1097-0355\(199524\)16:4<318::AID-IMHJ2280160407>3.0.CO;2-L](https://doi.org/10.1002/1097-0355(199524)16:4<318::AID-IMHJ2280160407>3.0.CO;2-L)
25. Gislason IL, Call JD. Dog Bite in Infancy: Trauma and Personality Development. *Journal of the American Academy of Child Psychiatry* 1982;21(2):203-07. doi: [https://doi.org/10.1016/S0002-7138\(09\)60921-3](https://doi.org/10.1016/S0002-7138(09)60921-3)
26. Macias D, Kwon DI, Walker PC, et al. Microvascular replantation of a composite facial avulsion in a 24-month-old child after dog bite. *Microsurgery* 2018;38(2):218-21. doi: <https://doi.org/10.1002/micr.30275>
27. Saha S. Life-Threatening Panfacial Wild Dog Bites in a Child. *Wilderness & Environmental Medicine* 2021;32(4):511-16. doi: <https://doi.org/10.1016/j.wem.2021.07.001>
28. Anyfantakis D, Botzakis E, Mplevrakis E, et al. Selective mutism due to a dog bite trauma in a 4-year-old girl: A case report. *Journal of Medical Case Reports* 2009;3

- 1  
2  
3 29. de Carvalho MF, Hardtke LA, de Souza MF, et al. Comminuted mandibular fracture in child  
4 victim of dog bite. *Dent Traumatol* 2012;28(4):324-8. doi: 10.1111/j.1600-  
5 9657.2011.01079.x [published Online First: 2011/11/22]  
6  
7 30. Glasscock SE, MacLean Jr WE. Use of Contact Desensitization and Shaping in the Treatment  
8 of Dog Phobia and Generalized Fear of the Outdoors. *Journal of Clinical Child Psychology*  
9 1990;19(2):169-71. doi: 10.1207/s15374424jccp1902\_9  
10  
11 31. De Keuster T, Lamoureux J, Kahn A. Epidemiology of dog bites: A Belgian experience of  
12 canine behaviour and public health concerns. *Veterinary Journal* 2006;172(3):482-87.  
13  
14 32. Hersant B, Cassier S, Constantinescu G, et al. Facial dog bite injuries in children: Retrospective  
15 study of 77 cases. *Annales De Chirurgie Plastique Esthetique* 2012;57(3):230-39. doi:  
16 10.1016/j.anplas.2011.11.003  
17  
18 33. Pédrone G, Ricard C, Bouilly M, et al. Assessment of 16-month Sequelae Due to Dog Bites  
19 Originally Studied in a French Multicenter Survey from 2009 to 2011. *Wounds*  
20 2018;30(5):84-89. [published Online First: 2018/03/10]  
21  
22 34. Rossman BR, Bingham RD, Emde RN. Symptomatology and adaptive functioning for children  
23 exposed to normative stressors, dog attack, and parental violence. *J Am Acad Child Adolesc*  
24 *Psychiatry* 1997;36(8):1089-97. doi: 10.1097/00004583-199708000-00016 [published  
25 Online First: 1997/08/01]  
26  
27 35. Rusch MD, Grunert BK, Sanger JR, et al. Psychological adjustment in children after traumatic  
28 disfiguring injuries: A 12-month follow-up. *Plastic and Reconstructive Surgery*  
29 2000;106(7):1451-58.  
30  
31 36. Touré G, Angoulangouli G, Méningaud J-P. Epidemiology and classification of dog bite injuries  
32 to the face: A prospective study of 108 patients. *Journal of Plastic, Reconstructive &*  
33 *Aesthetic Surgery* 2015;68(5):654-58. doi: <https://doi.org/10.1016/j.bjps.2015.01.001>  
34  
35 37. Boat BW, Dixon CA, Pearl E, et al. Pediatric dog bite victims: a need for a continuum of care.  
36 *Clin Pediatr (Phila)* 2012;51(5):473-7. doi: 10.1177/0009922811435504 [published Online  
37 First: 2012/02/02]  
38  
39 38. Schalamon J, Ainoedhofer H, Singer G, et al. Analysis of dog bites in children who are younger  
40 than 17 years. *Pediatrics* 2006;117(3):E374-E79. doi: 10.1542/peds.2005-1451  
41  
42 39. Shen J, Li S, Xiang H, et al. Antecedents and consequences of pediatric dog-bite injuries and  
43 their developmental trends: 101 cases in rural China. *Accident Analysis and Prevention*  
44 2014;63:22-29.  
45  
46 40. Parent B, Bykowski MR, Marji FP, et al. Pediatric Craniofacial Fractures From Canine Bites. *J*  
47 *Craniofac Surg* 2021;32(4):1627-32. doi: 10.1097/scs.00000000000007546 [published  
48 Online First: 2021/03/21]  
49  
50 41. Doogan S, Thomas GV. Origins of fear of dogs in adults and children: The role of conditioning  
51 processes and prior familiarity with dogs. *Behaviour Research and Therapy* 1992;30(4):387-  
52 94. doi: [https://doi.org/10.1016/0005-7967\(92\)90050-Q](https://doi.org/10.1016/0005-7967(92)90050-Q)  
53  
54 42. Rusch MD, Gould LJ, Dzwierzynski WW, et al. Psychological Impact of Traumatic Injuries:  
55 What the Surgeon Can Do. *Plastic and Reconstructive Surgery* 2002;109(1):18-24.  
56  
57 43. Caffo E, Belaise C. Psychological aspects of traumatic injury in children and adolescents. *Child*  
58 *Adolesc Psychiatr Clin N Am* 2003;12(3):493-535. doi: 10.1016/s1056-4993(03)00004-x  
59 [published Online First: 2003/08/13]  
60  
61 44. Farrell LJ, Kershaw H, Ollendick T. Play-Modified One-Session Treatment for Young Children  
62 with a Specific Phobia of Dogs: A Multiple Baseline Case Series. *Child Psychiatry Hum*  
63 *Dev* 2018;49(2):317-29. doi: 10.1007/s10578-017-0752-x [published Online First:  
64 2017/08/03]  
65  
66 45. Radtke SR, Muskett A, Coffman MF, et al. Bibliotherapy for Specific Phobias of Dogs in  
67 Young Children: A Pilot Study. *Journal of Child and Family Studies* 2023;32(2):373-83.  
68 doi: 10.1007/s10826-022-02304-2

1  
2  
3  
4  
5  
6  
7  
8  
9  
10  
11  
12  
13  
14  
15  
16  
17  
18  
19  
20  
21  
22  
23  
24  
25  
26  
27  
28  
29  
30  
31  
32  
33  
34  
35  
36  
37  
38  
39  
40  
41  
42  
43  
44  
45  
46  
47  
48  
49  
50  
51  
52  
53  
54  
55  
56  
57  
58  
59  
60

46. Oxley JA, Santa K, Meyer G, et al. A Systematic Scoping Review of Human-Dog Interactions in Virtual and Augmented Reality: The Use of Virtual Dog Models and Immersive Equipment. *Frontiers in Virtual Reality* 2022;3 doi: 10.3389/frvir.2022.782023

47. Farrell LJ, Miyamoto T, Donovan CL, et al. Virtual Reality One-Session Treatment of Child-Specific Phobia of Dogs: A Controlled, Multiple Baseline Case Series. *Behavior Therapy* 2021;52(2):478-91. doi: <https://doi.org/10.1016/j.beth.2020.06.003>

Confidential: For Review Only

1  
2  
3  
4 **FIGURES**  
5  
6  
7

8  
9 Figure 1. Flow chart of study search and screening process for studies of psychological  
10  
11 consequences of dog bites to children  
12  
13  
14  
15  
16  
17  
18  
19  
20  
21  
22  
23  
24  
25  
26  
27  
28  
29  
30  
31  
32  
33  
34  
35  
36  
37  
38  
39  
40  
41  
42  
43  
44  
45  
46  
47  
48  
49  
50  
51  
52  
53  
54  
55  
56  
57  
58  
59  
60

1  
2  
3  
4  
5  
6  
7  
8  
9  
10  
11  
12  
13  
14  
15  
16  
17  
18  
19  
20  
21  
22  
23  
24  
25  
26  
27  
28  
29  
30  
31  
32  
33  
34  
35  
36  
37  
38  
39  
40  
41  
42  
43  
44  
45  
46  
47  
48  
49  
50  
51  
52  
53  
54  
55  
56  
57  
58  
59  
60

**TABLES**

Confidential: For Review Only

## **A review of psychological effects of dog bites in children**

**Westgarth, Carri<sup>1</sup>, Provazza, Serena<sup>2</sup>, Nicholas, Jade<sup>3</sup>, Gray, Victoria<sup>2</sup>.**

1 Department of Livestock and One Health, Institute of Infection, Veterinary and Ecological

Sciences, University of Liverpool, Leahurst Campus, Neston, Cheshire, CH66 1QU, UK

2 Department of Clinical Health Psychology, Alder Hey Children's NHS Foundation Trust, Eaton Road, Liverpool, Merseyside, L12 2AP, UK.

3 Independent Researcher, Hampshire, UK.

### **ABSTRACT**

#### **Background**

Dog bites are a concerning health problem in children and one of the leading causes of non-fatal injuries in this population. Dog attacks not only cause physical injuries but can also lead to long-term psychological problems. A ~~systematic~~ review was performed to investigate the scope of literature on psychological effects of dog bites on a paediatric population.

#### **Methods**

A literature search was performed on Web of Knowledge database between 1982-June 2023, returning 249 results. 14 primary studies reporting the psychological consequences of dog bites in children or adolescents were classed as eligible and 9 further studies added from prior knowledge and bibliographical searches. 23 studies involving 1894 participants met the criteria and were included in this review.

#### **Results**

Of these 23 studies, 8 were case studies or small case series reports (up to n=4), 14 larger descriptive studies, and 1 analytical cross-sectional study. There was a mixture of retrospective and prospective data-gathering. The most common psychological consequences of dog bites in children were post-traumatic stress disorder, dog phobia, nightmares and symptoms of anxiety and avoidance behaviours.

1  
2  
3  
4  
5  
6  
7  
8  
9  
10  
11  
12  
13  
14  
15  
16  
17  
18  
19  
20  
21  
22  
23  
24  
25  
26  
27  
28  
29  
30  
31  
32  
33  
34  
35  
36  
37  
38  
39  
40  
41  
42  
43  
44  
45  
46  
47  
48  
49  
50  
51  
52  
53  
54  
55  
56  
57  
58  
59  
60

## Conclusions

Studies on dog bites in a paediatric population with a specific focus on the psychological ~~consequences~~ consequences associated with dog bites and their management are sparse. Future research and practice should more greatly consider the psychological impact in child victims of dog bites and their family members, as well as their management to avoid development of mental health issues and improve their quality of life. Future research also needs to ascertain the efficacy of using Virtual Reality in treating children with dog phobia.

## KEY MESSAGES

- Psychological consequences of dog bites to children are common but under-researched and often overlooked.
- Typical consequences of dog bites are post-traumatic stress disorder, dog phobia, nightmares and symptoms of anxiety and avoidance behaviours.
- Treatment of dog phobias can be challenging to deliver.
- Virtual reality offers a potential ethical and safe, controlled environment for cognitive behavioural therapy regarding dogs.

## INTRODUCTION

Dog ownership is argued to provide some health benefits <sup>1-3</sup>, however, dogs, as well as other animals, may cause severe injuries to humans. Although there are no global estimates of dog bites incidence, the World Health Organization reports dog bites account for tens of millions of injuries annually <sup>4</sup>. As a result, dog bites represent a major public health concern, affecting predominately the paediatric population <sup>5</sup>. In the UK, incidence of hospital admissions for dog bites in children (14 or under) is stable at approximately 14.4 per 100,000 population per year <sup>5</sup>.

1  
2  
3 It is well established that most of the child dog bite victims are bitten inside the home, and most  
4 dogs involved are known to the victim <sup>6,7</sup>. The COVID-19 global pandemic and the subsequent  
5 implementation of lockdowns with a 'stay at home' order forced children to spend more time than  
6 usual at home with a significant increase in dog bites <sup>8,9</sup>.  
7  
8  
9  
10  
11  
12

13  
14 Some evidence supports that children are more vulnerable to dog attacks compared to adults  
15 because of their smaller physical size, their underestimation of risk and their tendency to behave  
16 more impulsively <sup>10</sup>, as well as leaning-in behaviour with animals in young children <sup>11</sup>. Rates of  
17 admission peak in the 5-9 age group <sup>8</sup>. Furthermore, children are often injured in the neck and head  
18 regions and many have facial wounds <sup>12-14</sup>. The younger the child the more frequent the bites are to  
19 the face <sup>14,15</sup> and young children have more extensive/severe injuries <sup>13,16</sup>.  
20  
21  
22  
23  
24  
25  
26  
27  
28  
29

30 In addition to physical impact, dog bites often carry health care costs <sup>8</sup>. They also produce  
31 psychological costs to the victims and other parties involved <sup>17-19</sup>, however, compared to physical,  
32 psychological consequences of dog bites and their management is still scarcely investigated and  
33 poorly reported <sup>20,21</sup>. Timely recognition of psychological symptoms caused by dog attacks in  
34 children and subsequent psychological support to the child victims and their families would be of  
35 critical importance to prevent development of future mental health issues, which would in turn  
36 influence the quality of life of the children and their caretakers. The aim of this systematic review  
37 was to explore current evidence on the psychological impact of dog bites in children and  
38 adolescents.  
39  
40  
41  
42  
43  
44  
45  
46  
47  
48  
49  
50  
51  
52

## 53 **METHODS**

### 54 Protocol and inclusion criteria

55  
56 This ~~systematic~~ review was conducted according to the standards established by the Preferred  
57 Reporting Items for Systematic Reviews <sup>22</sup>.  
58  
59  
60



1  
2  
3  
4  
5 A search of ~~Web of Knowledge~~Web of Science Core Collection database was performed to identify  
6 original research articles focusing on psychological consequences of dog bite injuries in the  
7  
8 paediatric population from 1982- June 2023. This single popular database was chosen due to time  
9  
10  
11  
12 constraints and its broad coverage of science, social sciences and arts and humanities. The search  
13  
14 term used on all fields was:

15  
16 ("child\* OR pediatric") AND (dog\* OR cani\*) AND (bit\* OR attack\*) AND  
17  
18 (psychological OR PTSD OR phobia OR trauma\* OR anxiety)  
19  
20  
21  
22  
23

24 At least the abstract needed to be available in English for assessment for relevant inclusion, and  
25 screening was performed by CW and SP. Articles were excluded if: they were not an original  
26 primary source of evidence in a scientific journal (ie book chapter or review papers were excluded);  
27 the study population did not include children (ie under 18 years of age, although it could also  
28 include adults); studies focused on bites in general (e.g., human bites, cat bites etc) rather than dog;  
29 the information reported was not specific to psychological effects of dog bites but rather on dog  
30 bites in general (e.g., wound management, dog bite incidence etc). Articles were excluded based on  
31 reading the full paper if the title or abstract did not already clearly exclude it; if the study purpose  
32 and population was deemed relevant, often the full paper needed to be read in order to find if  
33 psychological effects had been reported. Further relevant studies were also identified from  
34 bibliographic searches and prior knowledge. See Figure 1 for study search and inclusion flowchart.  
35  
36  
37  
38  
39  
40  
41  
42  
43  
44  
45  
46  
47  
48  
49 Due to the low number of~~Relatively few~~ studies ~~that~~ met the inclusion criteria and thus sample size  
50  
51 was low. In addition, the study designs found would be classed as ~~and~~ low-level of evidence ~~study~~  
52  
53 designs used ~~((such as case studies~~ and descriptive case series and cross-sectional studies). For  
54  
55 these reasons, all studies and their findings have been reported here rather than exclusion based on  
56  
57 quality. Evaluation and summary of the study design and psychological findings was performed by  
58  
59 CW and JN.  
60

## RESULTS

Out of 249 papers screened for eligibility, 14 studies met the criteria and were included in this review, along with 9 other studies identified through prior knowledge and bibliographies, totalling 23 studies involving 1894 participants (Figure 1). Of these 23 studies, eight were single case studies or small case series (up to 4 children per report)<sup>23-30</sup> ([Supplementary Materials Table 1](#)). Thirteen were descriptive studies of larger patient groups<sup>7 15 18 19 31-39</sup>, one was a case-control study but the psychological findings were only descriptive<sup>40</sup>, and one was an analytical cross-sectional study<sup>41</sup> ([Table 2 Supplementary Materials Table 2 and 3](#)). A mixture of retrospective (ie incidental review of past case records, survey regarding fear of dogs, [see Supplementary Materials Table 2](#)) and prospective data collection (deliberate interview of dog bite cases as they attended hospital, follow-up interview of a cohort of bitten children, [see Supplementary Materials Table 3](#)) methods were reported depending on the study, and sometimes both.

### Summary of the findings Effects on children

One study specific to dog bite patients estimated that 70% of children had demonstrated concerning behaviours since the incident<sup>37</sup>. Post-traumatic Stress Disorder ~~was commonly encountered, being~~ [\(PTSD\) was](#) mentioned in eight studies: 2 of 4 children (a family in which one child was bitten)<sup>23</sup>, diagnosed in a case study<sup>28</sup>, diagnosed in descriptive studies of dog bite patients at a prevalence of 12/22<sup>31</sup>, 12/22<sup>19</sup>, 19/358<sup>18</sup>; 98% within 5 days of a traumatic facial incident some of which were dog bites<sup>35</sup>, and also mentioned more generally in two other studies, one which included (16%) child dog bite patients<sup>34</sup> and one specifically of child dog bites<sup>36</sup>. [PTSD was typically diagnosed through use of a screening questionnaire or meeting six major criteria under DSM-IV.](#) Acute Stress Disorder (ASD) was also mentioned (38/358 patients in<sup>18</sup>) and observed to be an early indicator of PTSD. In a study of children interviewed after a traumatic experience (16% of which were dog bites), PTSD symptoms were greater in the dog attack and parental violence groups than the 'mild

1  
2  
3 stressor' group, and mothers of bitten children were also observed to develop PTSD which was  
4 associated with child PTSD score as reported by the parent<sup>34</sup>. In addition, in the dog attack group  
5 mothers observed girls to have greater PTSD symptoms and boys to have greater dissociative  
6 symptoms, while child self-report showed boys to have greater PTSD symptoms. Other studies did  
7 not find evidence of gender/age effects in regards to PTSD in child dog bites<sup>18 31</sup>. The severity of  
8 the symptoms seemed to be related to the severity of the attacks; children who sustained more  
9 physically severe or multiple bites were more likely to develop PTSD symptoms<sup>18 19 31</sup>.

10  
11  
12 Other than formally reporting PTSD/ASD, specific symptoms most commonly described in the  
13 articles were fearfulness/avoidance of dogs<sup>24 25 27 30 33 36-39</sup> and sleep disturbance/nightmares<sup>23-25 31</sup>  
14 <sup>36-38 40</sup>. Other symptoms included bed wetting<sup>23 25</sup>, selective mutism<sup>28</sup>, traumatic memories/re-  
15 living<sup>19 28 31</sup>, talking a lot about the incident<sup>37</sup>, increased arousal<sup>19 31</sup>, anger/aggression<sup>24 31</sup>,  
16 withdrawn/depressed/numbing<sup>19 28 31 35</sup>, fearful<sup>37</sup>, panic attacks<sup>27</sup>, anxiety<sup>35 36</sup>, hypervigilance<sup>31</sup>,  
17 difficulty playing/avoidance of playing outdoors<sup>24 30</sup>, anxiety about hospitals<sup>37</sup>, fear of dying or re-  
18 injury<sup>35</sup>, and phobia of own image<sup>36</sup>.

### 40 Effects on parents

41  
42 Notably, parents reported changes in their behaviours as well, proving that dog bites represent a  
43 burden not only for the victims but also for their family<sup>34 37</sup>. Parents described feeling shaken<sup>25</sup>,  
44 guilty, fearful for child's safety and worried about scars<sup>37</sup>.

### 51 Treatment of children

52  
53 Despite the reporting of psychological symptoms after dog bites in children, it was rare for  
54 psychological treatment to be recorded; although it featured in case studies<sup>23 25 27-30</sup>, when  
55 evaluating descriptive studies it was only reported in 2/100<sup>15</sup>, 2/277<sup>7</sup>, 2/38<sup>40</sup> patients. Indeed, two  
56  
57  
58  
59  
60

1  
2  
3 studies specifically noted no children received any psychological services (0/22<sup>19</sup>; 0/34<sup>37</sup>) but 50%  
4  
5 of parents felt it would be helpful<sup>37</sup>.  
6  
7  
8  
9

### 10 Other observations

11  
12 Hon et al (2007) acknowledged that one challenge to collecting these data is that in an emergency  
13 department service where dog bites present is it might be difficult to gather information about  
14 psychological and emotional trauma<sup>21</sup>. Clearly there is an unidentified gap in both the literature and  
15 patient need for psychological assessment. In addition it has been suggested that interventions  
16 should also include educational programmes on the risk and severity of dog attacks offered to  
17 parents and children, given dog bites can have significant psychological consequences that can  
18 negatively impact on children quality of life<sup>29</sup>.  
19  
20  
21  
22  
23  
24  
25  
26  
27  
28  
29

## 30 **DISCUSSION**

31  
32 The main purpose of this review was to explore the current literature on paediatric dog bites, with a  
33 specific focus on the psychological impacts of dog bites in children, as the psychological  
34 consequences of dog bites as well as their treatment are often overlooked<sup>20 21</sup>. Evidence suggested  
35 that children bitten by dogs are at high risk of developing psychological disturbances, ranging from  
36 fear of dogs to clinical PTSD, however, few studies mentioned psychological management or  
37 treatment offered after dog attacks. It appears that assessing children in an emergency department  
38 (ED) to evaluate psychological sequelae following dog bites, and further offering them  
39 psychological support, can be difficult and/or lacks consideration. This may result in psychological  
40 symptoms significantly impacting children and potentially worsening. A form of follow-up  
41 assessment is likely to be required to assess whether initial symptoms of psychological distress have  
42 settled, but whom this responsibility falls to once a patient is discharged from the ED, is unclear.  
43  
44 Further, not only did dog injuries have an impact on the victims, but they also affected their carers.  
45  
46 Psychological symptoms showed by young victims of dog bites seemed to be long lasting with  
47  
48  
49  
50  
51  
52  
53  
54  
55  
56  
57  
58  
59  
60

1  
2  
3 some studies reporting over 12 months. Age and gender differences were inconclusive between  
4  
5 studies but across studies more severe bites commonly resulted in more serious psychological  
6  
7 impact.  
8  
9

10  
11  
12 It has become increasingly recognised that there is a need and opportunity to evaluate victims of  
13 traumatic injuries for psychological distress so that they can be appropriately referred on. For  
14 example this can occur during physical treatment such as plastic surgery.<sup>42</sup> However, It is clear  
17 from our review that many children who have been bitten by dogs or are otherwise fearful of dogs  
20 may benefit from psychological screening and if required, treatment, but this does not appear to be  
23 regularly occurring in practice. This is particularly concerning given children are in a crucial  
25 developmental stage with varied levels of supportive systems and resilience, and PTSD is a  
27 common psychiatric disorder after a child has a traumatic experience.<sup>43</sup>  
28  
29  
30  
31

32  
33 Although different approaches have been found to be effective in treating results of trauma and in  
34 particular phobia ~~for~~ of dogs in children, CBT (cognitive behavioural therapy) regarding some form  
35 of graded exposure appears to be the most widely utilised<sup>44 45</sup>. A difficulty with this is the ethical  
36 and practical safety implications regarding controlled exposure to real animals who can be difficult  
37 to access, unpredictable and to some extent uncontrollable in their behaviours, and with their own  
38 welfare considerations<sup>46</sup>. For example, one intervention states *“Parents were not provided with*  
39 *explicit instructions on how to find dogs but were encouraged to consider various options: dogs*  
40 *owned by extended family members, neighbors, and friends; dogs at pet stores, breeders, and*  
41 *animal shelters; dogs at the park or other recreation areas”*<sup>45</sup>. Another play-based intervention  
42 used dogs with handlers within the intensive session, with no description about how these had been  
43 assessed for suitability, and *“during the session, the child was encouraged to engage in a range of*  
44 *different tasks with each dog including approaching and patting the dog, offering the dog treats and*  
45 *walking the dog on the lead”*<sup>44</sup>. Great care must be taken in order to be able to gradually control the  
46  
47  
48  
49  
50  
51  
52  
53  
54  
55  
56  
57  
58  
59  
60

1  
2  
3 intensity of exposure and also safeguard both child and animal welfare during such treatment so that  
4  
5 neither becomes overwhelmed and both have a positive experience. This includes providing very  
6  
7 clear guidance to those delivering it, including parents.  
8  
9

10  
11  
12 A potential more ethical solution to these challenges during the intensive and early stages of therapy  
13  
14 would be to use virtual reality <sup>46</sup>. This would allow a gradual and controlled increase in exposure to  
15  
16 particular dog behaviours required for that case. For example, Farrel (2021) have suggested the use  
17  
18 of Virtual Reality therapy in treating dog phobia can be possible using just one treatment session <sup>47</sup>.  
19  
20 In eight children with specific phobia of dogs, after one month follow-up, 75% of the children were  
21  
22 considered recovered. The authors concluded that VR can be effectively be used as an alternative to  
23  
24 the classic in-vivo exposure-based therapy and might overcome some of its challenges as the most  
25  
26 difficult CBT technique to deliver. More research is needed to confirm the efficacy of VR as an  
27  
28 effective treatment of dog fear in a paediatric population.  
29  
30  
31  
32  
33

34  
35 This review has the merit of investigating and summarising existing evidence on psychological  
36  
37 effects of paediatric dog bites and their management, as to the best of our knowledge, such  
38  
39 investigation has not been conducted before. However, it presents with some limitations. First of  
40  
41 all, even though the literature search was performed on a highly relevant database, it was only a  
42  
43 single database and some studies may be missing from this review. Additionally, of the few studies  
44  
45 identified, many had a very limited sample size, which may limited the statistical power and  
46  
47 generalizability of the findings. They also mostly used study designs with a high risk of bias, such  
48  
49 as case studies, and descriptive cross-sectional studies, often with retrospective data collection  
50  
51 simply reviewing case notes. For example, unless it was particularly noted because a parent or child  
52  
53 raised the issue, psychological impacts may have remained unreported. Those studies of a  
54  
55 potentially lower risk of bias that used prospective data collection still varied in quality of screening  
56  
57 methods for psychological outcomes and whether follow-up was used. Therefore, the conclusions  
58  
59  
60

1  
2  
3 drawn here should be taken with caution. Notwithstanding the above limitations, this review  
4  
5 provides an insight into the psychological consequences of paediatric dog bites.  
6  
7  
8  
9

10 To conclude, dog bites in children represent a traumatic event, which can cause devastating  
11  
12 psychological consequences in the victims and in their families. A thorough investigation of the  
13  
14 psychological impact of dog bites on children and their parents followed by a prompt  
15  
16 multidisciplinary management of both physical and psychological symptoms would lead to better  
17  
18 outcomes, preventing the occurrence of more severe mental health problems such as phobia and  
19  
20 PTSD and improve the quality of life of the victims and their families. Furthermore, educational  
21  
22 programmes on the risk and severity of dog attacks should be offered to parents and children, to  
23  
24 prevent dog bites. Cognitive behavioural therapy can be used to treat fear of dogs in children, with  
25  
26 VR representing an alternative to the classic in vivo exposition therapy that requires more  
27  
28 investigation. Future research should focus more on the psychological impact of dog injuries and  
29  
30  
31  
32  
33 on the treatment of child victims of dog bites and their family members, to avoid development of  
34  
35 mental health issues and improve their quality of life.  
36  
37  
38  
39

#### 40 **FUNDING**

41  
42 This work was supported by the Faculty of Health and Life Sciences, University of Liverpool.  
43

#### 44 **COMPETING INTERESTS**

45  
46 CW is a member of the Merseyside Dog Safety Partnership, which has a website containing useful  
47  
48 resources for dog bite prevention. [www.merseydogsafeco.uk](http://www.merseydogsafeco.uk). There are no other competing  
49  
50  
51 interests to declare.  
52

#### 53 **RESEARCH ETHICS APPROVAL**

54  
55 Not applicable - this study does not involve human participants.  
56

#### 57 **CONTRIBUTORS**

CW conceptualised the paper. CW and SP performed the searches and paper selection. CW and JN reviewed the papers and assimilated the data. CW and SP wrote the first draft. All authors including VG commented on and revised the paper. CW submitted the paper. CW is responsible for the content as guarantor.

## DATA AVAILABILITY

No other datasets were generated.

## PATIENT CONSENT FOR PUBLICATION

Not applicable.

## PROVENANCE AND PEER REVIEW

Commissioned; externally peer reviewed.

## REFERENCES

1. Herzog H. The Impact of Pets on Human Health and Psychological Well-Being: Facto, Fiction, or Hypothesis? *Current Directions in Psychological Science* 2011;20:236-39.
2. O'Haire M. Companion animals and human health: Benefits, challenges, and the road ahead. *Journal of Veterinary Behaviour* 2010;5:226-34.
3. Rodriguez KE, Herzog H, Gee NR. Variability in Human-Animal Interaction Research. *Front Vet Sci* 2021;7:9. doi: 10.3389/fvets.2020.619600
4. WHO. Animal Bites: World Health Organisation; 2018 [cited 2024 9th January]. Available from: <https://www.who.int/news-room/fact-sheets/detail/animal-bites>.
5. Tulloch JSP, Owczarczak-Garstecka SC, Fleming KM, et al. English hospital episode data analysis (1998–2018) reveal that the rise in dog bite hospital admissions is driven by adult cases. *Scientific Reports* 2021;11(1):1767. doi: 10.1038/s41598-021-81527-7
6. Cornelissen JMR, Hopster H. Dog bites in The Netherlands: A study of victims, injuries, circumstances and aggressors to support evaluation of breed specific legislation. *Veterinary Journal* 2010;186(3):292-98. doi: 10.1016/j.tvjl.2009.10.001
7. Chiam SC, Solanki NS, Lodge M, et al. Retrospective review of dog bite injuries in children presenting to a South Australian tertiary children's hospital emergency department. *J Paediatr Child Health* 2014;50(10):791-4. doi: 10.1111/jpc.12642 [published Online First: 2014/07/22]
8. Tulloch JSP, Minford S, Pimblett V, et al. Paediatric emergency department dog bite attendance during the COVID-19 pandemic: an audit at a tertiary children's hospital. *BMJ paediatrics open* 2021;5(1):e001040-e40. doi: 10.1136/bmjpo-2021-001040
9. Parente G, Gargano T, Di Mitri M, et al. Consequences of COVID-19 Lockdown on Children and Their Pets: Dangerous Increase of Dog Bites among the Paediatric Population. *Children (Basel)* 2021;8(8) doi: 10.3390/children8080620 [published Online First: 2021/08/28]
10. Shen J, Rouse J, Godbole M, et al. Systematic Review: Interventions to Educate Children About Dog Safety and Prevent Pediatric Dog-Bite Injuries: A Meta-Analytic Review. *J Pediatr Psychol* 2017;42(7):779-91. doi: 10.1093/jpepsy/jsv164



1  
2  
3  
4  
5  
6  
7  
8  
9  
10  
11  
12  
13  
14  
15  
16  
17  
18  
19  
20  
21  
22  
23  
24  
25  
26  
27  
28  
29  
30  
31  
32  
33  
34  
35  
36  
37  
38  
39  
40  
41  
42  
43  
44  
45  
46  
47  
48  
49  
50  
51  
52  
53  
54  
55  
56  
57  
58  
59  
60

11. Meints K, Syrnyk C, De Keuster T. Why do children get bitten in the face? *Injury Prevention* 2010;16(Suppl 1):A172-A73. doi: 10.1136/ip.2010.029215.617
12. Kasbekar AV, Garfit H, Duncan C, et al. Dog bites to the head and neck in children; an increasing problem in the UK. *Clinical Otolaryngology* 2013;38(3):259-62. doi: 10.1111/coa.12094
13. Khan K, Horswell BB, Samanta D. Dog-Bite Injuries to the Craniofacial Region: An Epidemiologic and Pattern-of-Injury Review at a Level 1 Trauma Center. *Journal of Oral and Maxillofacial Surgery* 2020;78(3):401-13. doi: <https://doi.org/10.1016/j.joms.2019.11.002>
14. Sribnick EA, Sarda S, Sawvel MS, et al. Dog bite injuries in children: Clinical implications for head involvement. *Trauma* 2016;18(3):210-15. doi: 10.1177/1460408616631772
15. Kahn A, Bauche P, Lamoureux J, et al. Child victims of dog bites treated in emergency departments: a prospective survey. *European Journal of Pediatrics* 2003;162(4):254-58. doi: 10.1007/s00431-002-1130-6
16. Brogan TV, Bratton SL, Dowd MD, et al. SEVERE DOG BITES IN CHILDREN. *Pediatrics* 1995;96(5):947-50.
17. Westgarth C, Watkins F. Chapter 23: Impact of dog aggression on victims. In: Mills DS, Westgarth C, eds. *Dog Bites: A Multidisciplinary Perspective*. 1st Edition ed. Sheffield: 5M Publishing 2017:309-20.
18. Ji L, Xiaowei Z, Chuanlin W, et al. Investigation of posttraumatic stress disorder in children after animal-induced injury in China. *Pediatrics* 2010;126(2):e320-4. doi: 10.1542/peds.2009-3530 [published Online First: 2010/07/14]
19. Peters V, Sottiaux M, Appelboom J, et al. Posttraumatic stress disorder after dog bites in children. *The Journal of Pediatrics* 2004;144(1):121-22. doi: <http://dx.doi.org/10.1016/j.jpeds.2003.10.024>
20. Jakeman M, Oxley JA, Owczarczak-Garstecka SC, et al. Pet dog bites in children: management and prevention. *BMJ Paediatrics Open* 2020;4(1):e000726. doi: 10.1136/bmjpo-2020-000726
21. Hon KLE, Fu CCA, Chor CM, et al. Issues associated with dog bite injuries in children and adolescents assessed at the emergency department. *Pediatric Emergency Care* 2007;23(7):445-49.
22. Page MJ, McKenzie JE, Bossuyt PM, et al. The PRISMA 2020 statement: an updated guideline for reporting systematic reviews. *BMJ* 2021;372:n71. doi: 10.1136/bmj.n71
23. Albano AM, Miller PP, Zarate R, et al. Behavioral assessment and treatment of PTSD in prepubertal children: Attention to developmental factors and innovative strategies in the case study of a family. *Cognitive and Behavioral Practice* 1997;4(2):245-62. doi: [https://doi.org/10.1016/S1077-7229\(97\)80003-X](https://doi.org/10.1016/S1077-7229(97)80003-X)
24. Drell MJ, Gaensbauer TJ, Siegel CH, et al. Clinical round table: A case of trauma to a 21-month-old girl. *Infant Mental Health Journal* 1995;16(4):318-33. doi: [https://doi.org/10.1002/1097-0355\(199524\)16:4<318::AID-IMHJ2280160407>3.0.CO;2-L](https://doi.org/10.1002/1097-0355(199524)16:4<318::AID-IMHJ2280160407>3.0.CO;2-L)
25. Gislason IL, Call JD. Dog Bite in Infancy: Trauma and Personality Development. *Journal of the American Academy of Child Psychiatry* 1982;21(2):203-07. doi: [https://doi.org/10.1016/S0002-7138\(09\)60921-3](https://doi.org/10.1016/S0002-7138(09)60921-3)
26. Macias D, Kwon DI, Walker PC, et al. Microvascular replantation of a composite facial avulsion in a 24-month-old child after dog bite. *Microsurgery* 2018;38(2):218-21. doi: <https://doi.org/10.1002/micr.30275>
27. Saha S. Life-Threatening Panfacial Wild Dog Bites in a Child. *Wilderness & Environmental Medicine* 2021;32(4):511-16. doi: <https://doi.org/10.1016/j.wem.2021.07.001>
28. Anyfantakis D, Botzakis E, Mplevrakis E, et al. Selective mutism due to a dog bite trauma in a 4-year-old girl: A case report. *Journal of Medical Case Reports* 2009;3

29. de Carvalho MF, Hardtke LA, de Souza MF, et al. Comminuted mandibular fracture in child victim of dog bite. *Dent Traumatol* 2012;28(4):324-8. doi: 10.1111/j.1600-9657.2011.01079.x [published Online First: 2011/11/22]
30. Glasscock SE, MacLean Jr WE. Use of Contact Desensitization and Shaping in the Treatment of Dog Phobia and Generalized Fear of the Outdoors. *Journal of Clinical Child Psychology* 1990;19(2):169-71. doi: 10.1207/s15374424jccp1902\_9
31. De Keuster T, Lamoureux J, Kahn A. Epidemiology of dog bites: A Belgian experience of canine behaviour and public health concerns. *Veterinary Journal* 2006;172(3):482-87.
32. Hersant B, Cassier S, Constantinescu G, et al. Facial dog bite injuries in children: Retrospective study of 77 cases. *Annales De Chirurgie Plastique Esthetique* 2012;57(3):230-39. doi: 10.1016/j.anplas.2011.11.003
33. Pédrone G, Ricard C, Bouilly M, et al. Assessment of 16-month Sequelae Due to Dog Bites Originally Studied in a French Multicenter Survey from 2009 to 2011. *Wounds* 2018;30(5):84-89. [published Online First: 2018/03/10]
34. Rossman BR, Bingham RD, Emde RN. Symptomatology and adaptive functioning for children exposed to normative stressors, dog attack, and parental violence. *J Am Acad Child Adolesc Psychiatry* 1997;36(8):1089-97. doi: 10.1097/00004583-199708000-00016 [published Online First: 1997/08/01]
35. Rusch MD, Grunert BK, Sanger JR, et al. Psychological adjustment in children after traumatic disfiguring injuries: A 12-month follow-up. *Plastic and Reconstructive Surgery* 2000;106(7):1451-58.
36. Touré G, Angoulangouli G, Méningaud J-P. Epidemiology and classification of dog bite injuries to the face: A prospective study of 108 patients. *Journal of Plastic, Reconstructive & Aesthetic Surgery* 2015;68(5):654-58. doi: <https://doi.org/10.1016/j.bjps.2015.01.001>
37. Boat BW, Dixon CA, Pearl E, et al. Pediatric dog bite victims: a need for a continuum of care. *Clin Pediatr (Phila)* 2012;51(5):473-7. doi: 10.1177/0009922811435504 [published Online First: 2012/02/02]
38. Schalamon J, Ainoedhofer H, Singer G, et al. Analysis of dog bites in children who are younger than 17 years. *Pediatrics* 2006;117(3):E374-E79. doi: 10.1542/peds.2005-1451
39. Shen J, Li S, Xiang H, et al. Antecedents and consequences of pediatric dog-bite injuries and their developmental trends: 101 cases in rural China. *Accident Analysis and Prevention* 2014;63:22-29.
40. Parent B, Bykowski MR, Marji FP, et al. Pediatric Craniofacial Fractures From Canine Bites. *J Craniofac Surg* 2021;32(4):1627-32. doi: 10.1097/scs.00000000000007546 [published Online First: 2021/03/21]
41. Doogan S, Thomas GV. Origins of fear of dogs in adults and children: The role of conditioning processes and prior familiarity with dogs. *Behaviour Research and Therapy* 1992;30(4):387-94. doi: [https://doi.org/10.1016/0005-7967\(92\)90050-Q](https://doi.org/10.1016/0005-7967(92)90050-Q)
42. Rusch MD, Gould LJ, Dzwierzynski WW, et al. Psychological Impact of Traumatic Injuries: What the Surgeon Can Do. *Plastic and Reconstructive Surgery* 2002;109(1):18-24.
43. Caffo E, Belaise C. Psychological aspects of traumatic injury in children and adolescents. *Child Adolesc Psychiatr Clin N Am* 2003;12(3):493-535. doi: 10.1016/s1056-4993(03)00004-x [published Online First: 2003/08/13]
44. Farrell LJ, Kershaw H, Ollendick T. Play-Modified One-Session Treatment for Young Children with a Specific Phobia of Dogs: A Multiple Baseline Case Series. *Child Psychiatry Hum Dev* 2018;49(2):317-29. doi: 10.1007/s10578-017-0752-x [published Online First: 2017/08/03]
45. Radtke SR, Muskett A, Coffman MF, et al. Bibliotherapy for Specific Phobias of Dogs in Young Children: A Pilot Study. *Journal of Child and Family Studies* 2023;32(2):373-83. doi: 10.1007/s10826-022-02304-2

1  
2  
3  
4  
5  
6  
7  
8  
9  
10  
11  
12  
13  
14  
15  
16  
17  
18  
19  
20  
21  
22  
23  
24  
25  
26  
27  
28  
29  
30  
31  
32  
33  
34  
35  
36  
37  
38  
39  
40  
41  
42  
43  
44  
45  
46  
47  
48  
49  
50  
51  
52  
53  
54  
55  
56  
57  
58  
59  
60

46. Oxley JA, Santa K, Meyer G, et al. A Systematic Scoping Review of Human-Dog Interactions in Virtual and Augmented Reality: The Use of Virtual Dog Models and Immersive Equipment. *Frontiers in Virtual Reality* 2022;3 doi: 10.3389/frvir.2022.782023

47. Farrell LJ, Miyamoto T, Donovan CL, et al. Virtual Reality One-Session Treatment of Child-Specific Phobia of Dogs: A Controlled, Multiple Baseline Case Series. *Behavior Therapy* 2021;52(2):478-91. doi: <https://doi.org/10.1016/j.beth.2020.06.003>

Confidential: For Review Only

1  
2  
3  
4 **FIGURES**  
5  
6  
7

8  
9 Figure 1. Flow chart of study search and screening process for studies of psychological  
10  
11 consequences of dog bites to children  
12  
13  
14  
15  
16  
17  
18  
19  
20  
21  
22  
23  
24  
25  
26  
27  
28  
29  
30  
31  
32  
33  
34  
35  
36  
37  
38  
39  
40  
41  
42  
43  
44  
45  
46  
47  
48  
49  
50  
51  
52  
53  
54  
55  
56  
57  
58  
59  
60

Confidential: For Review Only

## TABLES

Table 1: Case studies/small case-series identified in searches of psychological consequences of dog bites to children.

| Paper title                                                                                                                                                      | Year | Author/s                                                                   | Study design                                                                                                                                                                                                                                                                                                                                             | Participants                                             | Psychological findings                                                                                                                                                                                                                                                                                                                                                                                                                                                                    |
|------------------------------------------------------------------------------------------------------------------------------------------------------------------|------|----------------------------------------------------------------------------|----------------------------------------------------------------------------------------------------------------------------------------------------------------------------------------------------------------------------------------------------------------------------------------------------------------------------------------------------------|----------------------------------------------------------|-------------------------------------------------------------------------------------------------------------------------------------------------------------------------------------------------------------------------------------------------------------------------------------------------------------------------------------------------------------------------------------------------------------------------------------------------------------------------------------------|
| Behavioural Assessment and Treatment of PTSD in Prepubertal Children: Attention to Developmental Factors and Innovative Strategies in the Case Study of a Family | 1997 | AM Albano<br>PP Miller<br>G-CotéDH<br>Barlow                               | Mixed-methods case study observing one family after a traumatic incident dog bite.<br>Prospective.<br>Diagnostic interviews.<br>Observational methods including rating sleep cycles of children, recording enuresis episodes and recording incidents of new behaviour since the incident.<br>Family behavioural tests with units of distress calculated. | N=4<br>M age 7<br>F age 6 (bitten)<br>F age 4<br>F age 2 | Oldest 2 children diagnosed with PTSD.<br>Nocturnal changes in 2 children (bed-wetting) represents a “significant change in functioning”.<br>All 4 children experienced moderate to severe sleep disturbances.<br>“It was noted that as the age of the child increased, the more cognitively mediated symptoms and expression of fear became apparent.”<br>Adult symptoms went into remission without treatment.                                                                          |
| Selective mutism due to a dog bite trauma in a 4-year-old girl: a case report                                                                                    | 2009 | D Anyfantakis<br>E Botzakis<br>E Mplevrakis<br>EK Symvoulakis<br>I Arbiros | Case study.<br>Retrospective.                                                                                                                                                                                                                                                                                                                            | N=1<br>F age 5                                           | On admission was confused and lethargic—findings showed hypovolemic shock.<br>2 <sup>nd</sup> day of hospitalisation—child was withdrawn and depressed—used non-verbal communication.<br>2 months after discharge was non-verbal and had recurrent traumatic memories.<br>Case met all criteria for selective mutism and acute PTSD.<br>Treatment consisted of “supportive psychotherapy for the child and consecutive sessions of counselling for her parents”.<br>Improvement after 6M. |
| Clinical Round Table: A Case of Trauma to a 21-Month-Old Girl                                                                                                    | 1995 | MJ Drell<br>TJ Gaensbauer<br>CH Siegel<br>M Sugar                          | Case study.<br>Retrospective.                                                                                                                                                                                                                                                                                                                            | N=1<br>F age 1                                           | Detailed account of symptoms and therapy of child and mother.<br>Child displayed fearfulness of dogs, nightmares, anger, difficulty playing.                                                                                                                                                                                                                                                                                                                                              |

|                                                                                                                |      |                                                                                  |                                                                                                                                                        |                                      |                                                                                                                                                                                                                                                                                                                                                                                                                                                                                                                                                                                                                                           |
|----------------------------------------------------------------------------------------------------------------|------|----------------------------------------------------------------------------------|--------------------------------------------------------------------------------------------------------------------------------------------------------|--------------------------------------|-------------------------------------------------------------------------------------------------------------------------------------------------------------------------------------------------------------------------------------------------------------------------------------------------------------------------------------------------------------------------------------------------------------------------------------------------------------------------------------------------------------------------------------------------------------------------------------------------------------------------------------------|
| Comminuted mandibular fracture in child victim of dog bite                                                     | 2012 | M-Furtado-de Carvalho<br>LAP-Hardtke<br>MF-Cota-de Souza<br>V-de-Oliveira Araujo | Case-study.<br>Retrospective.                                                                                                                          | N=1<br>M-age-3                       | The-patient-was-seen-every-day-by-oral-and-maxillofacial-surgeons; dieticians, pediatricians, plastic surgeons, ophthalmologists, otorhinolaryngologists, physiotherapists, and psychologists.”<br>Emphasis-on-the-importance-of-a-prompt-multi-disciplinary-approach.                                                                                                                                                                                                                                                                                                                                                                    |
| CASE-REPORT: Dog-Bites-in-Infancy, Trauma and Personality Development                                          | 1982 | IL-Gislason<br>JD-Call                                                           | Case-series-of-children-bitten-by-dogs.<br>Retrospective.<br>Interviewed-accompanied-by-parents-on-4-separate-occasions.<br>Semi-structured-interview. | N=3<br>M-age-1<br>F-age-2<br>F-age-3 | “(first-child)-personality-changed-from-being-charming-and-outgoing-prior-to-the-bite-to-being-cautious-and-inhibited-after-the-bite.”<br>First-child-referring-to-dog-as-“the-bad-dog”-and-mentioning-wanting-to-shoot-the-dog-when-he-grows-up.<br>Clinginess-increased-in-second-child-after-incident.<br>Second-child-had-nightmares-for-3-years.<br>Third-child-developed-bed-wetting.<br>Third-child-showed-increased-clinginess, thumb-sucking, nightmares.<br>Third-child-described-as-“withdrawn”-after-incident.<br>All-children-more-afraid-of-strange-dogs-after-their-incidents.<br>All-mothers-were-psychologically-shaken. |
| Use-of-contact-desensitization-and-shaping-in-the-treatment-of-Dog-Phobia-and-Generalized-Fear-of-the-Outdoors | 2010 | SE-Glassecock<br>WE-MacLean-Jr                                                   | Case-study.<br>Prospective.<br>Combination-of-contact-desensitization, shaping-and-family-counselling.                                                 | N=1<br>F-age-6                       | “subsequently-developed-a-phobic-reaction-to-dogs-and-an-avoidance-of-playing-outdoors”-after-dog-bite.<br>Consistent-response-to-DS-and-shaping.<br>Study-showed-evidence-that-treatment-needed-maintenance-to-avoid-reverting-back.                                                                                                                                                                                                                                                                                                                                                                                                     |
| Microvascular-replantation-of-a-composite-facial-avulsion-in-a-24-month-child-after-dog-bite                   | 2017 | D-Macias<br>DI-Kwon<br>PC-Walker<br>NR-Peterson                                  | Case-study.<br>Retrospective.                                                                                                                          | N=1<br>F-age-2                       | 8-months-post-op-“The-patient’s-mood-and-activity-level-had-returned-to-pre-trauma-baseline-according-to-the-patient’s-mother.”                                                                                                                                                                                                                                                                                                                                                                                                                                                                                                           |
| Life-Threatening-Panfacial-Wild-Dog-Bites-in-a-Child                                                           | 2021 | S-Saha                                                                           | Case-study.<br>Retrospective.                                                                                                                          | N=1<br>M-age-1                       | “Psychologically, for the first 6 mo, he experienced severe bouts of panic attacks from loud noises,                                                                                                                                                                                                                                                                                                                                                                                                                                                                                                                                      |

|  |  |  |  |  |                                                                                                                                                                                                                                                                                                                          |
|--|--|--|--|--|--------------------------------------------------------------------------------------------------------------------------------------------------------------------------------------------------------------------------------------------------------------------------------------------------------------------------|
|  |  |  |  |  | especially the noises of lightning during storms.”<br>“He improved thereafter, and after 9 mo, while still avoiding all dogs, he would sometimes be fearful after hearing the noise of leaves rustling during high winds.”<br>“Otherwise, he recovered well under the supervision of a psychologist and a pediatrician.” |
|--|--|--|--|--|--------------------------------------------------------------------------------------------------------------------------------------------------------------------------------------------------------------------------------------------------------------------------------------------------------------------------|

**Table 2—Descriptive studies (larger than n=4), and cross-sectional studies, using both retrospective investigation and prospective follow-up, identified in searches of psychological consequences of dog bites to children.**

| Paper title                                                                                                                              | Year | Author/s                                                     | Study design                                                                                                                                                                                                                                                                                                                                                                                                                                                                                                                    | Participants                                                                   | Psychological findings                                                                                                                                                                                                                                                                                                                                                                                                                                                                                                                                                                                           |
|------------------------------------------------------------------------------------------------------------------------------------------|------|--------------------------------------------------------------|---------------------------------------------------------------------------------------------------------------------------------------------------------------------------------------------------------------------------------------------------------------------------------------------------------------------------------------------------------------------------------------------------------------------------------------------------------------------------------------------------------------------------------|--------------------------------------------------------------------------------|------------------------------------------------------------------------------------------------------------------------------------------------------------------------------------------------------------------------------------------------------------------------------------------------------------------------------------------------------------------------------------------------------------------------------------------------------------------------------------------------------------------------------------------------------------------------------------------------------------------|
| Pediatric Dog Bite Victims: A Need for a Continuum of Care                                                                               | 2012 | B Boat<br>C Dixon<br>E Pearl<br>L Thielen<br>SE Bucher       | Descriptive study.<br>Prospective.<br>Inclusion criteria were 0Y-16Y with presenting complaint of “dog bite” to pediatric emergency department.<br>Parent completed a questionnaire after enrolment.<br>4 weeks later parents had 30-min phone interview.<br>Information obtained included: a) bite incident specifics, b) further medical/psychological care needed by child c) contact with additional agencies d) changes in the child’s behaviour e) changes in parental concerns f) parent feedback on additional services | N=34<br>50 enrolled,<br>34 completed follow-up<br>Mean age 8yrs,<br>21 M, 13 F | No patients were hospitalised.<br>70% of victims demonstrated concerning behaviours since incident (most commonly talking a lot about the incident (29%), being fearful of dogs (27%), avoiding dogs (27%), being anxious or worried about seeing doctors or going to hospital (24%), being fearful (24%), having nightmares (21%).<br>Parents also reported concerns (eg. feeling guilty (59%), worried about scars (59), fearful for child’s safety (44%).<br>No children received any psychological services.<br>50% of parents believed their children would benefit from interventions for help with fears. |
| Retrospective review of dog bite injuries in children presenting to a South Australian tertiary children’s hospital emergency department | 2014 | SC Chiam<br>NS Solanki<br>M Lodge<br>M Higgins<br>AL Sparrow | Descriptive study.<br>Retrospective.<br>Review of children presenting to ED between 2009-2011.                                                                                                                                                                                                                                                                                                                                                                                                                                  | N=277<br>Ages 0-17                                                             | 2 children referred to a psychologist for management of post-traumatic stress.                                                                                                                                                                                                                                                                                                                                                                                                                                                                                                                                   |
| Epidemiology of dog bites: A Belgian experience of                                                                                       | 2006 | F De Keuster<br>J Lamoureux<br>A Kahn                        | 3 studies conducted in Belgium on bites in children, of which one relevant to our review.                                                                                                                                                                                                                                                                                                                                                                                                                                       | Study 3<br>N=22                                                                | “Among the 22 children, 12 had shown symptoms of PTSD for more than one month; 5 had all                                                                                                                                                                                                                                                                                                                                                                                                                                                                                                                         |

|                                                                                                                           |             |                                                                                                             |                                                                                                                                                                                                                                                                                                                                               |                                                       |                                                                                                                                                                                                                                                                                                                                                                                                                                                                                                                                                                                                             |
|---------------------------------------------------------------------------------------------------------------------------|-------------|-------------------------------------------------------------------------------------------------------------|-----------------------------------------------------------------------------------------------------------------------------------------------------------------------------------------------------------------------------------------------------------------------------------------------------------------------------------------------|-------------------------------------------------------|-------------------------------------------------------------------------------------------------------------------------------------------------------------------------------------------------------------------------------------------------------------------------------------------------------------------------------------------------------------------------------------------------------------------------------------------------------------------------------------------------------------------------------------------------------------------------------------------------------------|
| <p>canine behaviour and public health concerns</p>                                                                        |             |                                                                                                             | <p>Descriptive study. Prospective. Questionnaire delivered to parents of child victims of dog bites, 2-9 months after minor surgical treatment.</p>                                                                                                                                                                                           | <p>Median age 7.5 (range 1-14 years). 12 M, 10 F</p>  | <p>DSM-IV criteria for PTSD and 7 had some but not all criteria". Symptoms included vivid recollection and re-living, avoidance behaviours or numbing, increased arousal, hypervigilance, nightmares, difficulties sleeping, aggression to siblings and peers. No difference was found for presence of PTSD symptoms in regard to age, gender, time since the bite, type of dog, place of the accident, owner of the dog, child's activity at the time of the accident, or part of the child's body bitten. "Only the children who suffered severe and/or multiple bites developed full PTSD symptoms".</p> |
| <p>Origins of fear of dogs in adults and children: The role of conditioning processes and prior familiarity with dogs</p> | <p>1991</p> | <p>S Doogan<br/>GV Thomas</p>                                                                               | <p>Analytical cross-sectional. Retrospective. Questionnaire to "investigate fear of dogs". Adults and children asked to recall origin of their fear. Using Geer's FSS-2. Chi square testing for significance.</p>                                                                                                                             | <p>N=100 adults<br/>N=30 children (8-9 years)</p>     | <p>"No difference in the frequency of being bitten or chased reported by fearful vs non fearful groups". "Significantly more fearful than non-fearful adults reported little contact with dogs prior to the onset of their fear (no significant difference in children)".</p>                                                                                                                                                                                                                                                                                                                               |
| <p>Facial dog bite injuries in children: Retrospective study of 77 cases</p>                                              | <p>2012</p> | <p>B Hersant<br/>S Cassier G<br/>Constantinescu<br/>P Gavelle<br/>M-P Vazquez<br/>A Picard<br/>N Kadlub</p> | <p>Descriptive study. Retrospective. Study from 2002 to 2010. "We analyzed epidemiological, clinical data, surgical outcomes". Paper in French, only abstract available.</p>                                                                                                                                                                  | <p>N=77<br/>Mean age 5.36yrs.</p>                     | <p>35.1% of children had psychological problems afterward.</p>                                                                                                                                                                                                                                                                                                                                                                                                                                                                                                                                              |
| <p>Investigation of Posttraumatic Stress Disorder in Children after Animal-Induced Injury in China</p>                    | <p>2010</p> | <p>L Ji<br/>Z Xiaowei<br/>W Chuanlin<br/>L Wei</p>                                                          | <p>Descriptive study. Prospective. Reviewed 358 charts and follow-up data. "Family Apgar Scale assessment and PTSD screening were performed at ED admission". "On week 1 after ED admission the patient underwent evaluation for acute stress disorder diagnosis by using the Child Acute Stress Questionnaire". PTSD screening after 3M.</p> | <p>N=358<br/>201 M<br/>157 F<br/>Mean age 9.4 yrs</p> | <p>38 met symptom criteria for ASD (Acute Stress Disorder). 19 patients developed PTSD—10 of which had major injuries. No significant differences regarding gender/age. ASD early predictor of PTSD.</p>                                                                                                                                                                                                                                                                                                                                                                                                    |



|                                                                                                                      |      |                                                                               |                                                                                                                                                                                                                                                                                                                                                                                                                                                                   |                                                                                                                                                    |                                                                                                                                                                                                                                                                                                                                                                                                                                                             |
|----------------------------------------------------------------------------------------------------------------------|------|-------------------------------------------------------------------------------|-------------------------------------------------------------------------------------------------------------------------------------------------------------------------------------------------------------------------------------------------------------------------------------------------------------------------------------------------------------------------------------------------------------------------------------------------------------------|----------------------------------------------------------------------------------------------------------------------------------------------------|-------------------------------------------------------------------------------------------------------------------------------------------------------------------------------------------------------------------------------------------------------------------------------------------------------------------------------------------------------------------------------------------------------------------------------------------------------------|
| Child victims of dog bites treated in emergency departments: a prospective study                                     | 2003 | A Kahn<br>P Bauche<br>J Lamoureux                                             | Descriptive study.<br>Prospective.<br>Children with dog bites from 6 Eds.<br>Pediatricians and nurses collected standardized information via questionnaire.                                                                                                                                                                                                                                                                                                       | N=100<br>Mean age<br>7.3 yrs<br>57 M, 43 F                                                                                                         | Two children were treated by a psychologist: one child bitten on the face at home, the other bitten on the leg in a public place and left alone without care.                                                                                                                                                                                                                                                                                               |
| Pediatric Craniofacial Fractures from Canine Bites                                                                   | 2021 | B Parent<br>MR Bykowski<br>FP Marji<br>S Ramgopal<br>JA Goldstein<br>JE Losee | Descriptive study.<br>Retrospective.<br>Included all pediatric dog bites between 2008–2019 at a single centre.<br>Selected cases with craniofacial fractures and described.                                                                                                                                                                                                                                                                                       | N=38 cases with craniofacial fractures described, of 3,602 paediatric dog bite encounters identified.<br>Age and gender for this group not stated. | Four patients (11%) subsequently diagnosed with PTSD, characterized mainly by recurring nightmares.<br>Two of these patients have required extensive counselling and anxiolytic medications.                                                                                                                                                                                                                                                                |
| Assessment of 16-month Sequelae Due to Dog Bites Originally Studied in a French Multicenter Survey from 2009 to 2011 | 2018 | G Pedrono<br>C Ricard<br>M Bouilly<br>C Beata<br>G Sareey<br>B Thelot         | Descriptive study.<br>Prospective.<br>485 dog bites at 8 hospital EDs, followed up 16 M later (Sep 2010–Dec 2011).<br>Data collected by telephone or email                                                                                                                                                                                                                                                                                                        | N=298<br>Mean age<br>28.1 yrs,<br>42% <15yrs                                                                                                       | Adult and children findings not reported separately, however: 47% reported long term consequences, 16% of these being psychological 1/7 still experienced pain 16M after bite.<br>27% reported morale effected, higher for F (32%) than males (22%).<br><32% respondents reported being afraid of dogs after being bitten, slightly less frequent with children <15Y.                                                                                       |
| Posttraumatic Stress Disorder After Dog Bites in Children                                                            | 2003 | V Peters<br>M Sottiaux<br>J Appleboom<br>A Kahn                               | Descriptive study.<br>Prospective.<br>Between Apr 2001—Feb 2002.<br>Child dog bite victims at pediatric ED.<br>Children under 16Y who received minor surgical treatment less than 48H after dog bite.<br>Parents agreed to do questionnaire 2–9M after bite.<br>Questionnaire with 60 items.<br>“Semistructured comprehensive interviews” by telephone.<br>8 questionnaires completed in further home visit.<br>“Statistical analyses were based on nonparametric | N=22<br>12 M, 10 F<br>Median age<br>7.5 yr                                                                                                         | 12/22 had PTSD symptoms for more than 1M, 5 had all DSM-IV criteria for PTSD; 7 children had some but not all criteria.<br>Symptoms included “vivid reviviscence of the traumatic event (12 children), avoidance behavior or numbing (7 children), and/or signs of increased arousal (6 children)”.<br>“Only the children who had severe and/or multiple bites had full PTSD symptoms; none of the children with an accidental bite from their pet did so.” |

|                                                                                                                       |      |                                                                         |                                                                                                                                                                                                                                                                                                                                                                                                                                                                                                                                                                                                                                                               |                                                                                       |                                                                                                                                                                                                                                                                                                                                                                                                                                                                                                                                                                                                                                                                                                                                                                                                                                                                                                                                                               |
|-----------------------------------------------------------------------------------------------------------------------|------|-------------------------------------------------------------------------|---------------------------------------------------------------------------------------------------------------------------------------------------------------------------------------------------------------------------------------------------------------------------------------------------------------------------------------------------------------------------------------------------------------------------------------------------------------------------------------------------------------------------------------------------------------------------------------------------------------------------------------------------------------|---------------------------------------------------------------------------------------|---------------------------------------------------------------------------------------------------------------------------------------------------------------------------------------------------------------------------------------------------------------------------------------------------------------------------------------------------------------------------------------------------------------------------------------------------------------------------------------------------------------------------------------------------------------------------------------------------------------------------------------------------------------------------------------------------------------------------------------------------------------------------------------------------------------------------------------------------------------------------------------------------------------------------------------------------------------|
|                                                                                                                       |      |                                                                         | tests and $\chi^2$ tests with Yates correction for small series”                                                                                                                                                                                                                                                                                                                                                                                                                                                                                                                                                                                              |                                                                                       | None received psychological support.                                                                                                                                                                                                                                                                                                                                                                                                                                                                                                                                                                                                                                                                                                                                                                                                                                                                                                                          |
| Symptomatology and Adaptive Functioning for Children Exposed to Normative Stressors, Dog Attack and Parental Violence | 1997 | BBR Rossman<br>RD Bingham<br>RN Emde                                    | Descriptive study. Prospective. 86 children aged 4-9 “interviewed after 3 types of aversive experience: repetitive exposure to parental violence, a dog attack, or mild stressor”. Parents completed (1) “family information and stressor structured interview”, (2) “impact of event PTSD adult symptom questionnaire”, (3) “PTSD Reaction Index”, (4) “Child dissociative checklist”, (5) “Life Events Questionnaire”, (6) “Children’s Behaviour Questionnaire”, (7) “Child Behaviour Checklist”. Children completed (1) “structured stressor interview”, (2) “PTSD reaction index”, (3) “Child Dissociative Index”, (4) “Peabody Picture Vocabulary Test”. | N=14 dog attack (DA)<br>10M 4F<br>4-6yrs n=4<br>7-9yrs n=10                           | “Parent report PTSD symptoms greater in both the DA and PV groups. Age and gender effects were significant for PTSD-R(p), showing greater symptoms for younger children and girls. However, interactions of group with age and gender showed that the overall age and gender trends occurred mainly in the DA group. In contrast, a group by gender interaction for child-reported PTSD symptoms and reflected in the DA group showed boys reporting more symptoms than girls. Interpretation of this result is complicated by the fact that although boys reported greater PTSD symptoms, parents observed girls to show higher symptom levels. Mothers observed girls to have greater PTSD symptoms and boys to have greater dissociative symptoms, while child report showed boys to have greater PTSD symptoms. Mothers’ PTSD symptoms significantly or marginally predicted greater child internalising behaviour problems and lower social competence.” |
| Psychological Adjustment in Children after Traumatic Disfiguring Injuries: A 12-Month Follow-Up                       | 2000 | MD Ruseh,<br>BK Grunert<br>JR Sanger<br>WW<br>Dzwierzynski<br>H Matloub | Descriptive study. Prospective. Children treated in plastic and reconstructive surgery department for traumatic facial or extremity injuries, which included dog bites. Psychological evaluations performed within 4 days of injury. Interviews for children and parents (structured). Follow ups done at 1, 3, 6 and 12 month intervals.                                                                                                                                                                                                                                                                                                                     | N=57<br>Age 3-12 yrs<br>40 M, 17 F<br>Not known<br>which children suffered dog bites. | “Within 5 days of the traumatic event, 98 percent of the children were symptomatic for post traumatic stress disorder, depression or anxiety” (all but one child). “One month after the injury, 82 percent were symptomatic”. “44 percent of the children continued to report symptoms at 12-month follow-up visits;                                                                                                                                                                                                                                                                                                                                                                                                                                                                                                                                                                                                                                          |

1  
2  
3  
4  
5  
6  
7  
8  
9  
10  
11  
12  
13  
14  
15  
16  
17  
18  
19  
20  
21  
22  
23  
24  
25  
26  
27  
28  
29  
30  
31  
32  
33  
34  
35  
36  
37  
38  
39  
40  
41  
42  
43  
44  
45  
46  
47  
48  
49  
50  
51  
52  
53  
54  
55  
56  
57  
58  
59  
60

|                                                                                                                      |      |                                                                                             |                                                                                                                                                                                                                                                                                |                                                                             |                                                                                                                                                                                                                                                                                                                                                                                                                                                                                                                                                                                                                                                                                         |
|----------------------------------------------------------------------------------------------------------------------|------|---------------------------------------------------------------------------------------------|--------------------------------------------------------------------------------------------------------------------------------------------------------------------------------------------------------------------------------------------------------------------------------|-----------------------------------------------------------------------------|-----------------------------------------------------------------------------------------------------------------------------------------------------------------------------------------------------------------------------------------------------------------------------------------------------------------------------------------------------------------------------------------------------------------------------------------------------------------------------------------------------------------------------------------------------------------------------------------------------------------------------------------------------------------------------------------|
|                                                                                                                      |      |                                                                                             | Categories assessed: reexperiencing symptoms, avoidance of thoughts/conversations promoting memory of incident, impaired attention/concentration, reaction to disfigurement, phantom pain.                                                                                     |                                                                             | and 21 percent met the diagnostic criteria for posttraumatic stress disorder". 37% children reported fear of dying. 75% children reported fear of re-injury. Children still experiencing fear of re-injury after 12M reduced partaking in "risky" or highly physical behaviours. No statistical significance in age. "82% of 17 girls (n=14) reported flashbacks at their 1-month follow up visits, compared with 45% of the 40 boys (n=18)(p=0.018). At the 12M follow up visits these differences no longer existed". "44% of our subjects exhibited significant long term psychological symptoms after their injuries that were directly attributable to their accidental injuries". |
| Analysis of Dog Bites in Children Who Are Younger Than 17 Years                                                      | 2006 | J Schalamon<br>H Ainoedhofer<br>G Singer<br>T Petnehazy<br>J Mayr<br>K Kiss<br>ME Hollwarth | Descriptive study. Retrospective/prospective. Review of medical charts of children under 17Y who sought medical attention for a dog bite between 1994-2003 at pediatric surgery department. Follow-up of 93% of the children 2-11 years after the dog attack (mean 7.2 years). | N=341<br>174 M, 167 F<br>Mean age 5.9yrs.                                   | 5 children complaining of nightmares after incidents. Fear of dogs remained in 34 children during long-term follow-up.                                                                                                                                                                                                                                                                                                                                                                                                                                                                                                                                                                  |
| Antecedents and consequences of pediatric dog bite injuries and their developmental trends: 101 cases in rural China | 2014 | J Shen<br>S Li<br>H Xiang<br>S Lu<br>D C Schwebel                                           | Descriptive study. Retrospective. All families had a dog bite victim under 18Y in the last 12 months. Structured interview with caregiver.                                                                                                                                     | N=101<br>65% Male<br>Mean age 8.3 yrs                                       | Children were reported to be generally unwilling to approach dogs after the incident and children tended to fear dogs to some degree after the incident.                                                                                                                                                                                                                                                                                                                                                                                                                                                                                                                                |
| Epidemiology and classification of dog bite injuries to the face: A prospective study of 108 patients                | 2015 | G Toure<br>G Angoulangouli<br>J-P Meningaud                                                 | Descriptive study. Prospective. Study carried out over 13 years of dog bite intake to emergency surgeries. Information sheet filled out by victims bitten on the face.                                                                                                         | 108 incidents of dog bites (to face and neck) out of 13021 patients<br>49 M | 23% encountered complications, of which 20% were psychological shock (anxiety and post-traumatic stress, sleep disorder, phobia of dogs and the patients own image).                                                                                                                                                                                                                                                                                                                                                                                                                                                                                                                    |

1  
2  
3  
4  
5  
6  
7  
8  
9  
10  
11  
12  
13  
14  
15  
16  
17  
18  
19  
20  
21  
22  
23  
24  
25  
26  
27  
28  
29  
30  
31  
32  
33  
34  
35  
36  
37  
38  
39  
40  
41  
42  
43  
44  
45  
46  
47  
48  
49  
50  
51  
52  
53  
54  
55  
56  
57  
58  
59  
60

|  |  |  |  |                    |  |
|--|--|--|--|--------------------|--|
|  |  |  |  | 59 F<br>69% <16yrs |  |
|--|--|--|--|--------------------|--|

Confidential: For Review Only

1  
2  
3  
4  
5  
6  
7  
8  
9  
10  
11  
12  
13  
14  
15  
16  
17  
18  
19  
20  
21  
22  
23  
24  
25  
26  
27  
28  
29  
30  
31  
32  
33  
34  
35  
36  
37  
38  
39  
40  
41  
42  
43  
44  
45  
46  
47  
48  
49  
50  
51  
52  
53  
54  
55  
56  
57  
58  
59  
60

Confidential: For Review Only



Figure 1. Flow chart of study search and screening process for studies of psychological consequences of dog bites to children

558x448mm (59 x 59 DPI)

### Supplementary Material: A review of psychological effects of dog bites in children

Westgarth, Carri., Provozza, Serena., Nicholas, Jade., Gray, Victoria.

Supplementary Table 1: Case studies/small case-series identified in searches of psychological consequences of dog bites to children.

| Paper title                                                                                                                                                      | Year | Author/s                                                                   | Study design                                                                                                                                                                                                                                                                                                                                 | Participants                                                | Psychological findings                                                                                                                                                                                                                                                                                                                                                                                                                                                           |
|------------------------------------------------------------------------------------------------------------------------------------------------------------------|------|----------------------------------------------------------------------------|----------------------------------------------------------------------------------------------------------------------------------------------------------------------------------------------------------------------------------------------------------------------------------------------------------------------------------------------|-------------------------------------------------------------|----------------------------------------------------------------------------------------------------------------------------------------------------------------------------------------------------------------------------------------------------------------------------------------------------------------------------------------------------------------------------------------------------------------------------------------------------------------------------------|
| Behavioural Assessment and Treatment of PTSD in Prepubertal Children: Attention to Developmental Factors and Innovative Strategies in the Case Study of a Family | 1997 | AM Albano<br>PP Miller<br>G Coté<br>DH Barlow                              | Mixed methods case study observing one family after a traumatic incident dog bite. Prospective. Diagnostic interviews. Observational methods including rating sleep cycles of children, recording enuresis episodes and recording incidents of new behaviour since the incident. Family behavioural tests with units of distress calculated. | N=4<br>M age 7<br>F age 6<br>(bitten)<br>F age 4<br>F age 2 | Oldest 2 children diagnosed with PTSD. Nocturnal changes in 2 children (bed wetting) represents a “significant change in functioning”. All 4 children experienced moderate to severe sleep disturbances. “It was noted that as the age of the child increased, the more cognitively mediated symptoms and expression of fear became apparent.” Adult symptoms went into remission without treatment.                                                                             |
| Selective mutism due to a dog bite trauma in a 4-year-old girl: a case report                                                                                    | 2009 | D Anyfantakis<br>E Botzakis<br>E Mplevrakis<br>EK Symvoulakis<br>I Arbiros | Case study. Retrospective.                                                                                                                                                                                                                                                                                                                   | N=1<br>F age 5                                              | On admission was confused and lethargic – findings showed hypovolemic shock. 2 <sup>nd</sup> day of hospitalisation – child was withdrawn and depressed – used non verbal communication. 2 months after discharge was non-verbal and had recurrent traumatic memories. Case met all criteria for selective mutism and acute PTSD. Treatment consisted of “supportive psychotherapy for the child and consecutive sessions of counselling for her parents”. Improvement after 6M. |

|                                                                                                                |      |                                                                                     |                                                                                                                                                        |                                      |                                                                                                                                                                                                                                                                                                                                                                                                                                                                                                                                                                                                                                           |
|----------------------------------------------------------------------------------------------------------------|------|-------------------------------------------------------------------------------------|--------------------------------------------------------------------------------------------------------------------------------------------------------|--------------------------------------|-------------------------------------------------------------------------------------------------------------------------------------------------------------------------------------------------------------------------------------------------------------------------------------------------------------------------------------------------------------------------------------------------------------------------------------------------------------------------------------------------------------------------------------------------------------------------------------------------------------------------------------------|
| Clinical Round Table: A Case of Trauma to a 21-Month-Old Girl                                                  | 1995 | MJ Drell<br>TJ Gaensbauer<br>CH Siegel<br>M Sugar                                   | Case study.<br>Retrospective.                                                                                                                          | N=1<br>F age 1                       | Detailed account of symptoms and therapy of child and mother.<br>Child displayed fearfulness of dogs, nightmares, anger, difficulty playing.                                                                                                                                                                                                                                                                                                                                                                                                                                                                                              |
| Comminuted mandibular fracture in child victim of dog bite                                                     | 2012 | M Furtado de Carvalho<br>LAP Hardtke<br>MF Cota de Souza<br>V de Oliveira<br>Araujo | Case study.<br>Retrospective.                                                                                                                          | N=1<br>M age 3                       | The patient was seen every day by oral and maxillofacial surgeons, dieticians, pediatricians, plastic surgeons, ophthalmologists, otorhinolaryngologists, physiotherapists, and psychologists.”<br>Emphasis on the importance of a prompt multi-disciplinary approach.                                                                                                                                                                                                                                                                                                                                                                    |
| CASE REPORT: Dog Bites in Infancy, Trauma and Personality Development                                          | 1982 | IL Gislason<br>JD Call                                                              | Case series of children bitten by dogs.<br>Retrospective.<br>Interviewed accompanied by parents on 4 separate occasions.<br>Semi structured interview. | N=3<br>M age 1<br>F age 2<br>F age 3 | “(first child) personality changed from being charming and outgoing prior to the bite to being cautious and inhibited after the bite.”<br>First child referring to dog as “the bad dog” and mentioning wanting to shoot the dog when he grows up.<br>Clinginess increased in second child after incident.<br>Second child had nightmares for 3 years.<br>Third child developed bed wetting.<br>Third child showed increased clinginess, thumb sucking, nightmares.<br>Third child described as “withdrawn” after incident.<br>All children more afraid of strange dogs after their incidents.<br>All mothers were psychologically shaken. |
| Use of contact desensitization and shaping in the treatment of Dog Phobia and Generalized Fear of the Outdoors | 2010 | SE Glasscock<br>WE MacLean Jr                                                       | Case study.<br>Prospective.<br>Combination of contact desensitization, shaping and family counselling.                                                 | N=1<br>F age 6                       | “subsequently developed a phobic reaction to dogs and an avoidance of playing outdoors” after dog bite.<br>Consistent response to DS and shaping.<br>Study showed evidence that treatment needed maintenance to avoid reverting back.                                                                                                                                                                                                                                                                                                                                                                                                     |
| Microvascular replantation of a composite facial avulsion in a 24-month-child after dog bite                   | 2017 | D Macias<br>DI Kwon<br>PC Walker<br>NR Peterson                                     | Case study.<br>Retrospective.                                                                                                                          | N=1<br>F age 2                       | 8 months post-op “The patient’s mood and activity level had returned to pre-trauma baseline according to the patient’s mother.”                                                                                                                                                                                                                                                                                                                                                                                                                                                                                                           |



1  
2  
3  
4  
5  
6  
7  
8  
9  
10  
11  
12  
13  
14  
15  
16  
17  
18  
19  
20  
21  
22  
23  
24  
25  
26  
27  
28  
29  
30  
31  
32  
33  
34  
35  
36  
37  
38  
39  
40  
41  
42  
43  
44  
45  
46

|                                                            |      |        |                               |                |                                                                                                                                                                                                                                                                                                                                                                                                                               |
|------------------------------------------------------------|------|--------|-------------------------------|----------------|-------------------------------------------------------------------------------------------------------------------------------------------------------------------------------------------------------------------------------------------------------------------------------------------------------------------------------------------------------------------------------------------------------------------------------|
| Life-Threatening<br>Panfacial Wild Dog<br>Bites in a Child | 2021 | S Saha | Case study.<br>Retrospective. | N=1<br>M age 1 | “Psychologically, for the first 6 mo, he experienced severe bouts of panic attacks from loud noises, especially the noises of lightning during storms.”<br>“He improved thereafter, and after 9 mo, while still avoiding all dogs, he would sometimes be fearful after hearing the noise of leaves rustling during high winds.”<br>“Otherwise, he recovered well under the supervision of a psychologist and a pediatrician.” |
|------------------------------------------------------------|------|--------|-------------------------------|----------------|-------------------------------------------------------------------------------------------------------------------------------------------------------------------------------------------------------------------------------------------------------------------------------------------------------------------------------------------------------------------------------------------------------------------------------|

Confidential: For Review Only

Supplementary Table 2 – Descriptive studies (larger than n=4), and cross-sectional studies, using only retrospective investigation identified in searches of psychological consequences of dog bites to children.

| Paper title                                                                                                                              | Year | Author/s                                                                                        | Study design                                                                                                                                                                                                              | Participants                                                                                          | Psychological findings                                                                                                                                                                                                                                                    |
|------------------------------------------------------------------------------------------------------------------------------------------|------|-------------------------------------------------------------------------------------------------|---------------------------------------------------------------------------------------------------------------------------------------------------------------------------------------------------------------------------|-------------------------------------------------------------------------------------------------------|---------------------------------------------------------------------------------------------------------------------------------------------------------------------------------------------------------------------------------------------------------------------------|
| Retrospective review of dog bite injuries in children presenting to a South Australian tertiary children's hospital emergency department | 2014 | SC Chiam<br>NS Solanki<br>M Lodge<br>M Higgins<br>AL Sparnon                                    | Descriptive study.<br>Retrospective.<br>Review of children presenting to ED between 2009-2011.                                                                                                                            | N=277<br>Ages 0-17                                                                                    | 2 children referred to a psychologist for management of post-traumatic stress.                                                                                                                                                                                            |
| Origins of fear of dogs in adults and children: The role of conditioning processes and prior familiarity with dogs                       | 1991 | S Doogan<br>GV Thomas                                                                           | Analytical cross-sectional.<br>Retrospective.<br>Questionnaire to "investigate fear of dogs".<br>Adults and children asked to recall origin of their fear.<br>Using Geer's FSS-2.<br>Chi square testing for significance. | N=100 adults<br>N=30 children<br>(8-9 years)                                                          | "No difference in the frequency of being bitten or chased reported by fearful vs non fearful groups".<br>"Significantly more fearful than non-fearful adults reported little contact with dogs prior to the onset of their fear (no significant difference in children)". |
| Facial dog bite injuries in children: Retrospective study of 77 cases                                                                    | 2012 | B Hersant<br>S Cassier G<br>Constantinescu<br>P Gavelle<br>M -P Vazquez<br>A Picard<br>N Kadlub | Descriptive study.<br>Retrospective.<br>Study from 2002 to 2010.<br>"We analyzed epidemiological, clinical data, surgical outcomes".<br>Paper in French, only abstract available.                                         | N=77<br>Mean age<br>5.36yrs.                                                                          | 35.1% of children had psychological problems afterward.                                                                                                                                                                                                                   |
| Pediatric Craniofacial Fractures from Canine Bites                                                                                       | 2021 | B Parent<br>MR Bykowski<br>FP Marji<br>S Ramgopal<br>JA Goldstein<br>JE Losee                   | Descriptive study.<br>Retrospective.<br>Included all pediatric dog bites between 2008-2019 at a single centre.<br>Selected cases with craniofacial fractures and described.                                               | N=38 cases with craniofacial fractures described, of 3,602 paediatric dog bite encounters identified. | Four patients (11%) subsequently diagnosed with PTSD, characterized mainly by recurring nightmares.<br>Two of these patients have required extensive counselling and anxiolytic medications.                                                                              |

|                                                                                                                      |      |                                                   |                                                                                                                                                     |                                           |                                                                                                                                                          |
|----------------------------------------------------------------------------------------------------------------------|------|---------------------------------------------------|-----------------------------------------------------------------------------------------------------------------------------------------------------|-------------------------------------------|----------------------------------------------------------------------------------------------------------------------------------------------------------|
|                                                                                                                      |      |                                                   |                                                                                                                                                     | Age and gender for this group not stated. |                                                                                                                                                          |
| Antecedents and consequences of pediatric dog bite injuries and their developmental trends: 101 cases in rural China | 2014 | J Shen<br>S Li<br>H Xiang<br>S Lu<br>D C Schwebel | Descriptive study.<br>Retrospective.<br>All families had a dog bite victim under 18Y in the last 12 months.<br>Structured interview with caregiver. | N=101<br>65% Male<br>Mean age 8.3 yrs     | Children were reported to be generally unwilling to approach dogs after the incident and children tended to fear dogs to some degree after the incident. |

Supplementary Table 3 – Descriptive studies (larger than n=4), and cross-sectional studies, using prospective follow-up, identified in searches of psychological consequences of dog bites to children.

| Paper title                                                                                    | Year | Author/s                                               | Study design                                                                                                                                                                                                                                                                                                                                                                                                                                                                                                                    | Participants                                                                   | Psychological findings                                                                                                                                                                                                                                                                                                                                                                                                                                                                                                                                                                                           |
|------------------------------------------------------------------------------------------------|------|--------------------------------------------------------|---------------------------------------------------------------------------------------------------------------------------------------------------------------------------------------------------------------------------------------------------------------------------------------------------------------------------------------------------------------------------------------------------------------------------------------------------------------------------------------------------------------------------------|--------------------------------------------------------------------------------|------------------------------------------------------------------------------------------------------------------------------------------------------------------------------------------------------------------------------------------------------------------------------------------------------------------------------------------------------------------------------------------------------------------------------------------------------------------------------------------------------------------------------------------------------------------------------------------------------------------|
| Pediatric Dog Bite Victims: A Need for a Continuum of Care                                     | 2012 | B Boat<br>C Dixon<br>E Pearl<br>L Thieken<br>SE Bucher | Descriptive study.<br>Prospective.<br>Inclusion criteria were 0Y-16Y with presenting complaint of “dog bite” to pediatric emergency department.<br>Parent completed a questionnaire after enrolment.<br>4 weeks later parents had 30 min phone interview.<br>Information obtained included: a) bite incident specifics, b) further medical/psychological care needed by child c) contact with additional agencies d) changes in the child’s behaviour e) changes in parental concerns f) parent feedback on additional services | N=34<br>50 enrolled,<br>34 completed follow-up<br>Mean age 8yrs,<br>21 M, 13 F | No patients were hospitalised.<br>70% of victims demonstrated concerning behaviours since incident (most commonly talking a lot about the incident (29%), being fearful of dogs (27%), avoiding dogs (27%), being anxious or worried about seeing doctors or going to hospital (24%), being fearful (24%), having nightmares (21%).<br>Parents also reported concerns (eg. feeling guilty (59%), worried about scars (59), fearful for child’s safety (44%).<br>No children received any psychological services.<br>50% of parents believed their children would benefit from interventions for help with fears. |
| Epidemiology of dog bites: A Belgian experience of canine behaviour and public health concerns | 2006 | T De Keuster<br>J Lamoureux<br>A Kahn                  | 3 studies conducted in Belgium on bites in children, of which one relevant to our review.<br>Descriptive study.<br>Prospective.<br>Questionnaire delivered to parents of child victims of dog bites, 2-9 months after minor surgical treatment.                                                                                                                                                                                                                                                                                 | Study 3 N=22<br>Median age 7.5 (range 1-14 years).<br>12 M, 10 F               | “Among the 22 children, 12 had shown symptoms of PTSD for more than one month; 5 had all DSM-IV criteria for PTSD and 7 had some but not all criteria”.<br>Symptoms included vivid recollection and re-living, avoidance behaviours or numbing, increased arousal, hypervigilance, nightmares, difficulties sleeping, aggression to siblings and peers.<br>No difference was found for presence of PTSD symptoms in regard to age, gender, time since the bite, type of dog, place of the accident, owner of the dog, child’s activity at the time of the accident, or part of the child’s body bitten.          |

|                                                                                                                      |      |                                                                       |                                                                                                                                                                                                                                                                                                                                                       |                                             |                                                                                                                                                                                                                                                                                                                                                                             |
|----------------------------------------------------------------------------------------------------------------------|------|-----------------------------------------------------------------------|-------------------------------------------------------------------------------------------------------------------------------------------------------------------------------------------------------------------------------------------------------------------------------------------------------------------------------------------------------|---------------------------------------------|-----------------------------------------------------------------------------------------------------------------------------------------------------------------------------------------------------------------------------------------------------------------------------------------------------------------------------------------------------------------------------|
|                                                                                                                      |      |                                                                       |                                                                                                                                                                                                                                                                                                                                                       |                                             | “Only the children who suffered severe and/or multiple bites developed full PTSD symptoms”.                                                                                                                                                                                                                                                                                 |
| Investigation of Posttraumatic Stress Disorder in Children after Animal-Induced Injury in China                      | 2010 | L Ji<br>Z Xiaowei<br>W Chuanlin<br>L Wei                              | Descriptive study.<br>Prospective.<br>Reviewed 358 charts and follow up data.<br>“Family Apgar Scale assessment and PTSD screening were performed at ED admission”.<br>“On week 1 after ED admission the patient underwent evaluation for acute stress disorder diagnosis by using the Child Acute Stress Questionnaire”.<br>PTSD screening after 3M. | N=358<br>201 M<br>157 F<br>Mean age 9.4 yrs | 38 met symptom criteria for ASD(Acute Stress Disorder).<br>19 patients developed PTSD – 10 of which had major injuries.<br>No significant differences regarding gender/age.<br>ASD early predictor of PTSD.                                                                                                                                                                 |
| Child victims of dog bites treated in emergency departments: a prospective study                                     | 2003 | A Kahn<br>P Bauche<br>J Lamoureux                                     | Descriptive study.<br>Prospective.<br>Children with dog bites from 6 Eds.<br>Pediatricians and nurses collected standardized information via questionnaire.                                                                                                                                                                                           | N=100<br>Mean age 7.3 yrs<br>57 M, 43 F     | Two children were treated by a psychologist: one child bitten on the face at home, the other bitten on the leg in a public place and left alone without care.                                                                                                                                                                                                               |
| Assessment of 16-month Sequelae Due to Dog Bites Originally Studied in a French Multicenter Survey from 2009 to 2011 | 2018 | G Pedrono<br>C Ricard<br>M Bouilly<br>C Beata<br>G Sarcey<br>B Thelot | Descriptive study.<br>Prospective.<br>485 dog bites at 8 hospital EDs, followed up 16 M later (Sep 2010-Dec 2011).<br>Data collected by telephone or email                                                                                                                                                                                            | N=298<br>Mean age 28.1 yrs, 42% <15yrs      | Adult and children findings not reported separately, however:<br>47% reported long term consequences, 16% of these being psychological<br>1/7 still experienced pain 16M after bite.<br>27% reported morale effected, higher for F (32%) than males (22%).<br><32% respondents reported being afraid of dogs after being bitten, slightly less frequent with children <15Y. |
| Posttraumatic Stress Disorder After Dog Bites in Children                                                            | 2003 | V Peters<br>M Sottiaux<br>J Appleboom<br>A Kahn                       | Descriptive study.<br>Prospective.<br>Between Apr 2001 – Feb 2002.<br>Child dog bite victims at pediatric ED .                                                                                                                                                                                                                                        | N=22<br>12 M, 10 F<br>Median age 7.5 yr     | 12/22 had PTSD symptoms for more than 1M, 5 had all DSM-IV criteria for PTSD; 7 children had some but not all criteria.<br>Symptoms included “vivid reviviscence of the traumatic event (12 children), avoidance behavior or                                                                                                                                                |

|                                                                                                                              |      |                                               |                                                                                                                                                                                                                                                                                                                                                                                                                                                                                                                                                                                                                                                                                                  |                                                                       |                                                                                                                                                                                                                                                                                                                                                                                                                                                                                                                                                                                                                                                                                                                                                                                                                                                                                                                                                                                            |
|------------------------------------------------------------------------------------------------------------------------------|------|-----------------------------------------------|--------------------------------------------------------------------------------------------------------------------------------------------------------------------------------------------------------------------------------------------------------------------------------------------------------------------------------------------------------------------------------------------------------------------------------------------------------------------------------------------------------------------------------------------------------------------------------------------------------------------------------------------------------------------------------------------------|-----------------------------------------------------------------------|--------------------------------------------------------------------------------------------------------------------------------------------------------------------------------------------------------------------------------------------------------------------------------------------------------------------------------------------------------------------------------------------------------------------------------------------------------------------------------------------------------------------------------------------------------------------------------------------------------------------------------------------------------------------------------------------------------------------------------------------------------------------------------------------------------------------------------------------------------------------------------------------------------------------------------------------------------------------------------------------|
|                                                                                                                              |      |                                               | <p>Children under 16Y who received minor surgical treatment less than 48H after dog bite.</p> <p>Parents agreed to do questionnaire 2-9M after bite. Questionnaire with 60 items.</p> <p>“Semistructured comprehensive interviews” by telephone.</p> <p>8 questionnaires completed in further home visit.</p> <p>“Statistical analyses were based on nonparametric tests and <math>\chi^2</math> tests with Yates correction for small series”</p>                                                                                                                                                                                                                                               |                                                                       | <p>numbing (7 children), and/or signs of increased arousal (6 children)”.</p> <p>“Only the children who had severe and/or multiple bites had full PTSD symptoms; none of the children with an accidental bite from their pet did so.”</p> <p>None received psychological support.</p>                                                                                                                                                                                                                                                                                                                                                                                                                                                                                                                                                                                                                                                                                                      |
| <p>Symptomatology and Adaptive Functioning for Children Exposed to Normative Stressors, Dog Attack and Parental Violence</p> | 1997 | <p>BBR Rossman<br/>RD Bingham<br/>RN Emde</p> | <p>Descriptive study. Prospective.</p> <p>86 children aged 4-9</p> <p>“interviewed after 3 types of aversive experience: repetitive exposure to parental violence, a dog attack, or mild stressor”.</p> <p>Parents completed (1) “family information and stressor structured interview”, (2) “impact of event PTSD adult symptom questionnaire”, (3) “PTSD Reaction Index”, (4) “Child dissociative checklist”, (5) “Life Events Questionnaire”, (6) “Children’s Behaviour Questionnaire”, (7) “Child Behaviour Checklist”.</p> <p>Children completed (1) “structured stressor interview”, (2) “PTSD reaction index”, (3) “Child Dissociative Index”, (4) “Peabody Picture Vocabulary Test”.</p> | <p>N=14 dog attack (DA)<br/>10M 4F<br/>4-6yrs n=4<br/>7-9yrs n=10</p> | <p>“Parent report PTSD symptoms greater in both the DA and PV groups.</p> <p>Age and gender effects were significant for PTSD-RI(p), showing greater symptoms for younger children and girls. However, interactions of group with age and gender showed that the overall age and gender trends occurred mainly in the DA group. In contrast, a group by gender interaction for child-reported PTSD symptoms and reflected in the DA group showed boys reporting more symptoms than girls. Interpretation of this result is complicated by the fact that although boys reported greater PTSD symptoms, parents observed girls to show higher symptom levels.</p> <p>Mothers observed girls to have greater PTSD symptoms and boys to have greater dissociative symptoms, while child report showed boys to have greater PTSD symptoms.</p> <p>Mothers’ PTSD symptoms significantly or marginally predicted greater child internalising behaviour problems and lower social competence.”</p> |

|                                                                                                       |      |                                                                                             |                                                                                                                                                                                                                                                                                                                                                                                                                                                                                                                                                        |                                                                                     |                                                                                                                                                                                                                                                                                                                                                                                                                                                                                                                                                                                                                                                                                                                                                                                                                                                                                                                                                                                                                                      |
|-------------------------------------------------------------------------------------------------------|------|---------------------------------------------------------------------------------------------|--------------------------------------------------------------------------------------------------------------------------------------------------------------------------------------------------------------------------------------------------------------------------------------------------------------------------------------------------------------------------------------------------------------------------------------------------------------------------------------------------------------------------------------------------------|-------------------------------------------------------------------------------------|--------------------------------------------------------------------------------------------------------------------------------------------------------------------------------------------------------------------------------------------------------------------------------------------------------------------------------------------------------------------------------------------------------------------------------------------------------------------------------------------------------------------------------------------------------------------------------------------------------------------------------------------------------------------------------------------------------------------------------------------------------------------------------------------------------------------------------------------------------------------------------------------------------------------------------------------------------------------------------------------------------------------------------------|
| Psychological Adjustment in Children after Traumatic Disfiguring Injuries: A 12-Month Follow-Up       | 2000 | MD Rusch,<br>BK Grunert<br>JR Sanger<br>WW Dzwierzynski<br>H Matloub                        | Descriptive study.<br>Prospective.<br>Children treated in plastic and reconstructive surgery department for traumatic facial or extremity injuries, which included dog bites.<br>Psychological evaluations performed within 4 days of injury.<br>Interviews for children and parents (structured).<br>Follow ups done at 1, 3, 6 and 12 month intervals.<br>Categories assessed: reexperiencing symptoms, avoidance of thoughts/conversations promoting memory of incident, impaired attention/concentration, reaction to disfigurement, phantom pain. | N=57<br>Age 3-12 yrs<br>40 M, 17 F<br>Not known which children suffered dog bites.  | “Within 5 days of the traumatic event, 98 percent of the children were symptomatic for post traumatic stress disorder, depression or anxiety” (all but one child).<br>“One month after the injury, 82 percent were symptomatic”.<br>“44 percent of the children continued to report symptoms at 12-month follow-up-visits, and 21 percent met the diagnostic criteria for posttraumatic stress disorder”.<br>37% children reported fear of dying.<br>75% children reported fear of re-injury.<br>Children still experiencing fear of re-injury after 12M reduced partaking in “risky” or highly physical behaviours.<br>No statistical significance in age.<br>“82% of 17 girls (n=14) reported flashbacks at their 1-month follow up visits, compared with 45% of the 40 boys (n=18)(p=0.018). At the 12M follow up visits these differences no longer existed”.<br>“44% of our subjects exhibited significant long term psychological symptoms after their injuries that were directly attributable to their accidental injuries”. |
| Analysis of Dog Bites in Children Who Are Younger Than 17 Years                                       | 2006 | J Schalamon<br>H Ainoedhofer<br>G Singer<br>T Petnehazy<br>J Mayr<br>K Kiss<br>ME Hollwarth | Descriptive study.<br>Retrospective/prospective.<br>Review of medical charts of children under 17Y who sought medical attention for a dog bite between 1994-2003 at pediatric surgery department.<br>Follow-up of 93% of the children 2-11 years after the dog attack (mean 7.2 years).                                                                                                                                                                                                                                                                | N=341<br>174 M, 167 F<br>Mean age 5.9yrs.                                           | 5 children complaining of nightmares after incidents.<br>Fear of dogs remained in 34 children during long-term follow-up.                                                                                                                                                                                                                                                                                                                                                                                                                                                                                                                                                                                                                                                                                                                                                                                                                                                                                                            |
| Epidemiology and classification of dog bite injuries to the face: A prospective study of 108 patients | 2015 | G Toure<br>G Angoulangouli<br>J-P Meningaud                                                 | Descriptive study.<br>Prospective.<br>Study carried out over 13 years of dog bite intake to emergency surgeries.<br>Information sheet filled out by victims bitten on the face.                                                                                                                                                                                                                                                                                                                                                                        | 108 incidents of dog bites (to face and neck) out of 13021 patients<br>49 M<br>59 F | 23% encountered complications, of which 20% were psychological shock (anxiety and post-traumatic stress, sleep disorder, phobia of dogs and the patients own image).                                                                                                                                                                                                                                                                                                                                                                                                                                                                                                                                                                                                                                                                                                                                                                                                                                                                 |

1  
2  
3  
4  
5  
6  
7  
8  
9  
10  
11  
12  
13  
14  
15  
16  
17  
18  
19  
20  
21  
22  
23  
24  
25  
26  
27  
28  
29  
30  
31  
32  
33  
34  
35  
36  
37  
38  
39  
40  
41  
42  
43  
44  
45  
46

|  |  |  |  |            |  |
|--|--|--|--|------------|--|
|  |  |  |  | 69% <16yrs |  |
|--|--|--|--|------------|--|

Confidential: For Review Only
